# Supplementary material for: An In Vivo Electroencephalographic Analysis of the Effect of Riluzole against Limbic and Absence Seizure and Comparison with Glutamate Antagonists
Source: MDPI journal article supplement (doi:10.3390/pharmaceutics15072006), 2023-07-22
Supplement: s1 [file s1]

# Supplementary materials

Details of the predictive model and pairwise comparisons are given below for each of the figures. The standardized normal probability plot is also shown for Figures 7-12.

## Summary

|                         |    |
|-------------------------|----|
| Figure 4. Kainate ..... | 2  |
| Figure 5. NMDA .....    | 4  |
| Figure 6. AMPA .....    | 6  |
| Figure 7. dSWDs.....    | 9  |
| Figure 7. nSWDs.....    | 14 |
| Figure 8. dSWDs.....    | 19 |
| Figure 8. nSWDs.....    | 23 |
| Figure 9. dSWDs.....    | 27 |
| Figure 9. nSWDs.....    | 31 |
| Figure 10. dSWDs.....   | 35 |
| Figure 10. nSWDs.....   | 39 |
| Figure 11. dSWDs.....   | 43 |
| Figure 11. nSWDs.....   | 47 |
| Figure 12. dSWDs.....   | 51 |
| Figure 12. nSWDs.....   | 55 |

Figure 4. Kainate

|                    |  | Odds ratio | Std. err. | z     | P> z          | [95% conf. interval] |          |
|--------------------|--|------------|-----------|-------|---------------|----------------------|----------|
| dose               |  |            |           |       |               |                      |          |
| 1                  |  | .6828332   | .7167615  | -0.36 | 0.716         | .0872607             | 5.34331  |
| 2                  |  | .0005935   | .0009226  | -4.78 | 0.000         | .0000282             | .0124943 |
| 3                  |  | 1.49e-06   | 2.89e-06  | -6.91 | 0.000         | 3.32e-08             | .0000668 |
| 4                  |  | 1.16e-06   | 2.29e-06  | -6.95 | 0.000         | 2.46e-08             | .000055  |
| time               |  |            |           |       |               |                      |          |
| 60                 |  | 6.8864     | 7.75482   | 1.71  | 0.087         | .7576153             | 62.59445 |
| 120                |  | 16.8396    | 22.70872  | 2.09  | 0.036         | 1.19801              | 236.7027 |
| 180                |  | 16.97877   | 22.90766  | 2.10  | 0.036         | 1.206341             | 238.9695 |
| dose#time          |  |            |           |       |               |                      |          |
| 1 60               |  | 1.36716    | 2.121306  | 0.20  | 0.840         | .0653255             | 28.61251 |
| 1 120              |  | .5590876   | .9569951  | -0.34 | 0.734         | .0195196             | 16.0136  |
| 1 180              |  | .557381    | .9537965  | -0.34 | 0.733         | .019479              | 15.94916 |
| 2 60               |  | 5.425655   | 8.776192  | 1.05  | 0.296         | .2278258             | 129.2115 |
| 2 120              |  | 1513.276   | 3268.6    | 3.39  | 0.001         | 21.94649             | 104344.8 |
| 2 180              |  | 492.7674   | 1002.14   | 3.05  | 0.002         | 9.152816             | 26529.51 |
| 3 60               |  | 1.906933   | 3.102177  | 0.40  | 0.692         | .078634              | 46.24453 |
| 3 120              |  | 23.54179   | 44.83849  | 1.66  | 0.097         | .5631344             | 984.1625 |
| 3 180              |  | 51.49656   | 100.5479  | 2.02  | 0.044         | 1.121484             | 2364.63  |
| 4 60               |  | 2.396902   | 3.956353  | 0.53  | 0.596         | .0943295             | 60.90503 |
| 4 120              |  | 28.93713   | 56.06556  | 1.74  | 0.082         | .6490179             | 1290.192 |
| 4 180              |  | 78.47254   | 154.2785  | 2.22  | 0.026         | 1.664329             | 3699.954 |
| dose#time          |  | Odds ratio | Std. err. | z     | Adjusted P> z |                      |          |
| (1 30) vs (0 30)   |  | 0,682833   | 0,716762  | -0,36 | 1.000         |                      |          |
| (1 60) vs (0 60)   |  | 0,933543   | 1,191829  | -0,05 | 1.000         |                      |          |
| (1 120) vs (0 120) |  | 0,381764   | 0,560812  | -0,66 | 1.000         |                      |          |
| (1 180) vs (0 180) |  | 0,380598   | 0,558851  | -0,66 | 1.000         |                      |          |
| (2 30) vs (0 30)   |  | 0,000594   | 0,000923  | -4,78 | <0.001        |                      |          |

|                    |          |          |       |        |
|--------------------|----------|----------|-------|--------|
| (2 30) vs (1 30)   | 0,000869 | 0,001339 | -4,58 | <0.001 |
| (2 60) vs (0 60)   | 0,00322  | 0,004604 | -4,01 | <0.001 |
| (2 60) vs (1 60)   | 0,003449 | 0,004859 | -4,02 | <0.001 |
| (2 120) vs (0 120) | 0,898066 | 1,460203 | -0,07 | 1.000  |
| (2 120) vs (1 120) | 2,352415 | 3,406125 | 0,59  | 1.000  |
| (2 180) vs (0 180) | 0,292437 | 0,434008 | -0,83 | 1.000  |
| (2 180) vs (1 180) | 0,768361 | 0,981941 | -0,21 | 1.000  |
| (3 30) vs (0 30)   | 1,49E-06 | 2,89E-06 | -6,91 | <0.001 |
| (3 30) vs (1 30)   | 2,18E-06 | 4,2E-06  | -6,77 | <0.001 |
| (3 30) vs (2 30)   | 0,002511 | 0,003701 | -4,06 | <0.001 |
| (3 60) vs (0 60)   | 2,84E-06 | 5,5E-06  | -6,59 | <0.001 |
| (3 60) vs (1 60)   | 3,04E-06 | 5,8E-06  | -6,67 | <0.001 |
| (3 60) vs (2 60)   | 0,000882 | 0,00129  | -4,81 | <0.001 |
| (3 120) vs (0 120) | 3,51E-05 | 6,69E-05 | -5,38 | <0.001 |
| (3 120) vs (1 120) | 9,19E-05 | 0,000157 | -5,43 | <0.001 |
| (3 120) vs (2 120) | 3,91E-05 | 7,28E-05 | -5,45 | <0.001 |
| (3 180) vs (0 180) | 7,67E-05 | 0,000144 | -5,05 | <0.001 |
| (3 180) vs (1 180) | 0,000202 | 0,000339 | -5,06 | <0.001 |
| (3 180) vs (2 180) | 0,000262 | 0,00044  | -4,92 | <0.001 |
| (4 30) vs (0 30)   | 1,16E-06 | 2,29E-06 | -6,95 | <0.001 |
| (4 30) vs (1 30)   | 1,71E-06 | 3,33E-06 | -6,8  | <0.001 |
| (4 30) vs (2 30)   | 0,001962 | 0,002968 | -4,12 | <0.001 |
| (4 30) vs (3 30)   | 0,781573 | 0,9063   | -0,21 | 1.000  |
| (4 60) vs (0 60)   | 2,79E-06 | 5,34E-06 | -6,68 | <0.001 |
| (4 60) vs (1 60)   | 2,99E-06 | 5,63E-06 | -6,76 | <0.001 |
| (4 60) vs (2 60)   | 0,000867 | 0,001246 | -4,91 | <0.001 |
| (4 60) vs (3 60)   | 0,982391 | 1,13095  | -0,02 | 1.000  |
| (4 120) vs (0 120) | 3,37E-05 | 6,45E-05 | -5,38 | <0.001 |
| (4 120) vs (1 120) | 8,83E-05 | 0,000152 | -5,44 | <0.001 |
| (4 120) vs (2 120) | 3,75E-05 | 7,02E-05 | -5,45 | <0.001 |
| (4 120) vs (3 120) | 0,960696 | 1,112515 | -0,03 | 1.000  |
| (4 180) vs (0 180) | 9,14E-05 | 0,000168 | -5,05 | <0.001 |
| (4 180) vs (1 180) | 0,00024  | 0,000395 | -5,07 | <0.001 |
| (4 180) vs (2 180) | 0,000313 | 0,000511 | -4,93 | <0.001 |
| (4 180) vs (3 180) | 1,190993 | 1,376949 | 0,15  | 1.000  |

Figure 5. NMDA

|                    |  | Odds ratio | Std. err. | z     | P> z          | [95% conf. interval] |          |
|--------------------|--|------------|-----------|-------|---------------|----------------------|----------|
| dose               |  |            |           |       |               |                      |          |
| 1                  |  | .8222685   | 1.403916  | -0.11 | 0.909         | .0289533             | 23.35228 |
| 2                  |  | .0008175   | .0015924  | -3.65 | 0.000         | .000018              | .0371947 |
| 3                  |  | .0012671   | .0024263  | -3.48 | 0.000         | .0000297             | .0540347 |
| 4                  |  | 1.34e-07   | 3.78e-07  | -5.60 | 0.000         | 5.22e-10             | .0000342 |
|                    |  |            |           |       |               |                      |          |
| time               |  |            |           |       |               |                      |          |
| 60                 |  | 37.10697   | 63.64475  | 2.11  | 0.035         | 1.286769             | 1070.066 |
| 120                |  | 14.01962   | 21.31596  | 1.74  | 0.082         | .7120953             | 276.0163 |
| 180                |  | 26.41636   | 45.38725  | 1.91  | 0.057         | .9107139             | 766.2387 |
|                    |  |            |           |       |               |                      |          |
| dose#time          |  |            |           |       |               |                      |          |
| 1 60               |  | .8659429   | 1.889058  | -0.07 | 0.947         | .012039              | 62.28578 |
| 1 120              |  | .8892055   | 1.68616   | -0.06 | 0.951         | .0216226             | 36.56766 |
| 1 180              |  | 1.14164    | 2.502849  | 0.06  | 0.952         | .0155387             | 83.87696 |
| 2 60               |  | .1112184   | .2237108  | -1.09 | 0.275         | .0021579             | 5.73232  |
| 2 120              |  | .1743823   | .3238442  | -0.94 | 0.347         | .0045787             | 6.641453 |
| 2 180              |  | .2577595   | .5196109  | -0.67 | 0.501         | .0049579             | 13.4008  |
| 3 60               |  | .0427238   | .0858564  | -1.57 | 0.117         | .000832              | 2.1939   |
| 3 120              |  | .0653301   | .1217729  | -1.46 | 0.143         | .0016924             | 2.521864 |
| 3 180              |  | .0919205   | .1846358  | -1.19 | 0.235         | .0017933             | 4.711678 |
| 4 60               |  | .9173558   | 2.107112  | -0.04 | 0.970         | .0101713             | 82.73652 |
| 4 120              |  | 11.37029   | 25.61177  | 1.08  | 0.280         | .1375386             | 939.9791 |
| 4 180              |  | 11.73415   | 28.34725  | 1.02  | 0.308         | .1030689             | 1335.906 |
|                    |  |            |           |       |               |                      |          |
| dose#time          |  | Odds ratio | Std. err. | z     | Adjusted P> z |                      |          |
| (1 30) vs (0 30)   |  | 0,822269   | 1,403916  | -0,11 | 1.000         |                      |          |
| (1 60) vs (0 60)   |  | 0,712038   | 1,465048  | -0,17 | 1.000         |                      |          |
| (1 120) vs (0 120) |  | 0,731166   | 1,287434  | -0,18 | 1.000         |                      |          |
| (1 180) vs (0 180) |  | 0,938734   | 1,940545  | -0,03 | 1.000         |                      |          |
| (2 30) vs (0 30)   |  | 0,000818   | 0,001592  | -3,65 | <0.001        |                      |          |

|                    |          |          |       |        |
|--------------------|----------|----------|-------|--------|
| (2 30) vs (1 30)   | 0,000994 | 0,001782 | -3,86 | <0.001 |
| (2 60) vs (0 60)   | 9,09E-05 | 0,000191 | -4,44 | <0.001 |
| (2 60) vs (1 60)   | 0,000128 | 0,000257 | -4,46 | <0.001 |
| (2 120) vs (0 120) | 0,000143 | 0,00028  | -4,51 | <0.001 |
| (2 120) vs (1 120) | 0,000195 | 0,000367 | -4,54 | <0.001 |
| (2 180) vs (0 180) | 0,000211 | 0,000435 | -4,1  | <0.001 |
| (2 180) vs (1 180) | 0,000225 | 0,000446 | -4,23 | <0.001 |
| (3 30) vs (0 30)   | 0,001267 | 0,002426 | -3,48 | <0.001 |
| (3 30) vs (1 30)   | 0,001541 | 0,002703 | -3,69 | <0.001 |
| (3 30) vs (2 30)   | 1,550013 | 2,425151 | 0,28  | 1.000  |
| (3 60) vs (0 60)   | 5,41E-05 | 0,000115 | -4,62 | <0.001 |
| (3 60) vs (1 60)   | 0,000076 | 0,000155 | -4,66 | <0.001 |
| (3 60) vs (2 60)   | 0,595428 | 0,901617 | -0,34 | 1.000  |
| (3 120) vs (0 120) | 8,28E-05 | 0,000165 | -4,71 | <0.001 |
| (3 120) vs (1 120) | 0,000113 | 0,000216 | -4,75 | <0.001 |
| (3 120) vs (2 120) | 0,580693 | 0,890282 | -0,35 | 1.000  |
| (3 180) vs (0 180) | 0,000117 | 0,000244 | -4,33 | <0.001 |
| (3 180) vs (1 180) | 0,000124 | 0,00025  | -4,47 | <0.001 |
| (3 180) vs (2 180) | 0,552756 | 0,838187 | -0,39 | 1.000  |
| (4 30) vs (0 30)   | 1,34E-07 | 3,78E-07 | -5,6  | <0.001 |
| (4 30) vs (1 30)   | 1,62E-07 | 4,47E-07 | -5,68 | <0.001 |
| (4 30) vs (2 30)   | 0,000163 | 0,000387 | -3,68 | <0.001 |
| (4 30) vs (3 30)   | 0,000105 | 0,00025  | -3,86 | <0.001 |
| (4 60) vs (0 60)   | 1,23E-07 | 3,2E-07  | -6,1  | <0.001 |
| (4 60) vs (1 60)   | 1,72E-07 | 4,31E-07 | -6,23 | <0.001 |
| (4 60) vs (2 60)   | 0,001348 | 0,002545 | -3,5  | <0.001 |
| (4 60) vs (3 60)   | 0,002264 | 0,004215 | -3,27 | 0,01   |
| (4 120) vs (0 120) | 1,52E-06 | 3,51E-06 | -5,81 | <0.001 |
| (4 120) vs (1 120) | 2,08E-06 | 4,59E-06 | -5,92 | <0.001 |
| (4 120) vs (2 120) | 0,010656 | 0,018232 | -2,65 | 0,08   |
| (4 120) vs (3 120) | 0,018351 | 0,031004 | -2,37 | 0,18   |
| (4 180) vs (0 180) | 1,57E-06 | 3,75E-06 | -5,59 | <0.001 |
| (4 180) vs (1 180) | 1,67E-06 | 3,84E-06 | -5,79 | <0.001 |
| (4 180) vs (2 180) | 0,00744  | 0,01262  | -2,89 | 0,04   |
| (4 180) vs (3 180) | 0,01346  | 0,022532 | -2,57 | 0,1    |

Figure 6. AMPA

|           |  | Odds ratio | Std. err. | z     | P> z  | [95% conf. interval] |          |
|-----------|--|------------|-----------|-------|-------|----------------------|----------|
| dose      |  |            |           |       |       |                      |          |
| 1         |  | 1.330599   | 1.217643  | 0.31  | 0.755 | .2213634             | 7.998138 |
| 2         |  | .999949    | .9286379  | -0.00 | 1.000 | .1619868             | 6.172715 |
| 3         |  | .0004024   | .0005078  | -6.19 | 0.000 | .0000339             | .0047742 |
| 4         |  | .0004216   | .0005299  | -6.18 | 0.000 | .0000359             | .0049506 |
|           |  |            |           |       |       |                      |          |
| time      |  |            |           |       |       |                      |          |
| 60        |  | 17.85303   | 22.80063  | 2.26  | 0.024 | 1.46089              | 218.1757 |
| 120       |  | 20.70689   | 26.27898  | 2.39  | 0.017 | 1.721315             | 249.0975 |
| 180       |  | 20.70677   | 26.27879  | 2.39  | 0.017 | 1.721312             | 249.0951 |
|           |  |            |           |       |       |                      |          |
| dose#time |  |            |           |       |       |                      |          |
| 1 60      |  | .8709128   | 1.541772  | -0.08 | 0.938 | .027108              | 27.98028 |
| 1 120     |  | .6473936   | 1.146173  | -0.25 | 0.806 | .0201449             | 20.80521 |
| 1 180     |  | .1928919   | .3038365  | -1.04 | 0.296 | .008801              | 4.227628 |
| 2 60      |  | .5114182   | .8364494  | -0.41 | 0.682 | .0207298             | 12.61705 |
| 2 120     |  | .4408657   | .7181633  | -0.50 | 0.615 | .0181014             | 10.73743 |
| 2 180     |  | .3727504   | .6101773  | -0.60 | 0.547 | .0150673             | 9.221482 |
| 3 60      |  | .3001461   | .4723985  | -0.76 | 0.444 | .0137287             | 6.561979 |
| 3 120     |  | .3571255   | .5551683  | -0.66 | 0.508 | .0169663             | 7.517155 |
| 3 180     |  | 1.74594    | 2.866957  | 0.34  | 0.734 | .0698709             | 43.62769 |
| 4 60      |  | .2054091   | .3284709  | -0.99 | 0.322 | .0089425             | 4.718254 |
| 4 120     |  | .346309    | .5448732  | -0.67 | 0.500 | .0158565             | 7.563474 |
| 4 180     |  | 1.678316   | 2.715933  | 0.32  | 0.749 | .0703749             | 40.02486 |

| dose#time          | Odds<br>ratio | Std. err. | z     | Adjusted<br>P> z |
|--------------------|---------------|-----------|-------|------------------|
| (1 30) vs (0 30)   | 1,330599      | 1,217643  | 0,31  | 1.000            |
| (1 60) vs (0 60)   | 1,158836      | 1,756229  | 0,1   | 1.000            |
| (1 120) vs (0 120) | 0,861422      | 1,305499  | -0,1  | 1.000            |
| (1 180) vs (0 180) | 0,256662      | 0,328807  | -1,06 | 1.000            |
| (2 30) vs (0 30)   | 0,999949      | 0,928638  | 0     | 1.000            |
| (2 30) vs (1 30)   | 0,751503      | 0,687706  | -0,31 | 1.000            |
| (2 60) vs (0 60)   | 0,511392      | 0,688495  | -0,5  | 1.000            |
| (2 60) vs (1 60)   | 0,441298      | 0,590488  | -0,61 | 1.000            |
| (2 120) vs (0 120) | 0,440843      | 0,589995  | -0,61 | 1.000            |
| (2 120) vs (1 120) | 0,511763      | 0,688843  | -0,5  | 1.000            |
| (2 180) vs (0 180) | 0,372731      | 0,502453  | -0,73 | 1.000            |
| (2 180) vs (1 180) | 1,452227      | 1,578484  | 0,34  | 1.000            |
| (3 30) vs (0 30)   | 0,000402      | 0,000508  | -6,19 | <0.001           |
| (3 30) vs (1 30)   | 0,000302      | 0,000383  | -6,4  | <0.001           |
| (3 30) vs (2 30)   | 0,000402      | 0,000508  | -6,19 | <0.001           |
| (3 60) vs (0 60)   | 0,000121      | 0,000187  | -5,84 | <0.001           |
| (3 60) vs (1 60)   | 0,000104      | 0,00016   | -5,96 | <0.001           |
| (3 60) vs (2 60)   | 0,000236      | 0,000324  | -6,1  | <0.001           |
| (3 120) vs (0 120) | 0,000144      | 0,000218  | -5,83 | <0.001           |
| (3 120) vs (1 120) | 0,000167      | 0,000254  | -5,71 | <0.001           |
| (3 120) vs (2 120) | 0,000326      | 0,000438  | -5,97 | <0.001           |
| (3 180) vs (0 180) | 0,000703      | 0,001058  | -4,82 | <0.001           |
| (3 180) vs (1 180) | 0,002737      | 0,003477  | -4,65 | <0.001           |
| (3 180) vs (2 180) | 0,001885      | 0,002525  | -4,68 | <0.001           |
| (4 30) vs (0 30)   | 0,000422      | 0,00053   | -6,18 | <0.001           |
| (4 30) vs (1 30)   | 0,000317      | 0,000399  | -6,39 | <0.001           |
| (4 30) vs (2 30)   | 0,000422      | 0,00053   | -6,18 | <0.001           |
| (4 30) vs (3 30)   | 1,047773      | 0,852924  | 0,06  | 1.000            |
| (4 60) vs (0 60)   | 8,66E-05      | 0,000138  | -5,89 | <0.001           |
| (4 60) vs (1 60)   | 7,47E-05      | 0,000118  | -6    | <0.001           |
| (4 60) vs (2 60)   | 0,000169      | 0,00024   | -6,12 | <0.001           |
| (4 60) vs (3 60)   | 0,717058      | 0,710815  | -0,34 | 1.000            |
| (4 120) vs (0 120) | 0,000146      | 0,000224  | -5,77 | <0.001           |
| (4 120) vs (1 120) | 0,00017       | 0,00026   | -5,65 | <0.001           |
| (4 120) vs (2 120) | 0,000331      | 0,00045   | -5,89 | <0.001           |
| (4 120) vs (3 120) | 1,016039      | 0,909064  | 0,02  | 1.000            |

|                    |          |          |       |        |
|--------------------|----------|----------|-------|--------|
| (4 180) vs (0 180) | 0,000708 | 0,001053 | -4,87 | <0.001 |
| (4 180) vs (1 180) | 0,002757 | 0,003442 | -4,72 | <0.001 |
| (4 180) vs (2 180) | 0,001899 | 0,002504 | -4,75 | <0.001 |
| (4 180) vs (3 180) | 1,00719  | 1,008357 | 0,01  | 1.000  |



Figure 7. dSWDs

|                  |  | Coefficient | Std. err. | z     | P> z  | [95% conf. interval] |           |
|------------------|--|-------------|-----------|-------|-------|----------------------|-----------|
| dose             |  |             |           |       |       |                      |           |
| 1                |  | -3.457624   | 3.791461  | -0.91 | 0.362 | -10.88875            | 3.973502  |
| 2                |  | 8.037342    | 3.785055  | 2.12  | 0.034 | .6187711             | 15.45591  |
| 3                |  | 11.626      | 3.789235  | 3.07  | 0.002 | 4.199235             | 19.05276  |
| 4                |  | 5.589016    | 3.795904  | 1.47  | 0.141 | -1.850819            | 13.02885  |
|                  |  |             |           |       |       |                      |           |
| timeknot1        |  | -.0884164   | .0908165  | -0.97 | 0.330 | -.2664136            | .0895807  |
| timeknot2        |  | .8547379    | .8277951  | 1.03  | 0.302 | -.7677106            | 2.477186  |
| timeknot3        |  | -2.448322   | 2.538848  | -0.96 | 0.335 | -7.424373            | 2.527729  |
| timeknot4        |  | 2.382087    | 3.506721  | 0.68  | 0.497 | -4.490959            | 9.255134  |
| timeknot5        |  | -.0392662   | 3.50672   | -0.01 | 0.991 | -6.912311            | 6.833779  |
|                  |  |             |           |       |       |                      |           |
| dose#c.timeknot1 |  |             |           |       |       |                      |           |
| 1                |  | .296521     | .128434   | 2.31  | 0.021 | .044795              | .548247   |
| 2                |  | -.0244965   | .128434   | -0.19 | 0.849 | -.2762225            | .2272295  |
| 3                |  | -.4398051   | .128434   | -3.42 | 0.001 | -.6915311            | -.1880791 |
| 4                |  | -.7148629   | .128434   | -5.57 | 0.000 | -.9665889            | -.4631369 |
|                  |  |             |           |       |       |                      |           |
| dose#c.timeknot2 |  |             |           |       |       |                      |           |
| 1                |  | -2.957487   | 1.170679  | -2.53 | 0.012 | -5.251976            | -.6629988 |
| 2                |  | -4.932006   | 1.170679  | -4.21 | 0.000 | -7.226495            | -2.637517 |
| 3                |  | -3.295722   | 1.170679  | -2.82 | 0.005 | -5.590211            | -1.001233 |
| 4                |  | -1.27463    | 1.170679  | -1.09 | 0.276 | -3.569119            | 1.019858  |
|                  |  |             |           |       |       |                      |           |
| dose#c.timeknot3 |  |             |           |       |       |                      |           |
| 1                |  | 9.389731    | 3.590474  | 2.62  | 0.009 | 2.352532             | 16.42693  |
| 2                |  | 21.09261    | 3.590474  | 5.87  | 0.000 | 14.05541             | 28.12981  |
| 3                |  | 17.59704    | 3.590474  | 4.90  | 0.000 | 10.55984             | 24.63424  |
| 4                |  | 11.69714    | 3.590474  | 3.26  | 0.001 | 4.659945             | 18.73434  |
|                  |  |             |           |       |       |                      |           |
| dose#c.timeknot4 |  |             |           |       |       |                      |           |
| 1                |  | -13.47325   | 4.959252  | -2.72 | 0.007 | -23.19321            | -3.753297 |

|                  |  |           |          |       |       |           |           |
|------------------|--|-----------|----------|-------|-------|-----------|-----------|
| 2                |  | -35.1701  | 4.959252 | -7.09 | 0.000 | -44.89006 | -25.45014 |
| 3                |  | -29.79965 | 4.959252 | -6.01 | 0.000 | -39.5196  | -20.07969 |
| 4                |  | -22.35794 | 4.959252 | -4.51 | 0.000 | -32.07789 | -12.63798 |
|                  |  |           |          |       |       |           |           |
| dose#c.timeknot5 |  |           |          |       |       |           |           |
| 1                |  | 13.24838  | 4.959251 | 2.67  | 0.008 | 3.528426  | 22.96833  |
| 2                |  | 28.76205  | 4.959251 | 5.80  | 0.000 | 19.04209  | 38.482    |
| 3                |  | 17.23898  | 4.959251 | 3.48  | 0.001 | 7.51903   | 26.95894  |
| 4                |  | 11.99959  | 4.959251 | 2.42  | 0.016 | 2.279639  | 21.71955  |
|                  |  |           |          |       |       |           |           |
| baseline         |  | -.0598782 | .0602984 | -0.99 | 0.321 | -.1780608 | .0583045  |
| _cons            |  | 112.0406  | 6.888952 | 16.26 | 0.000 | 98.53853  | 125.5427  |

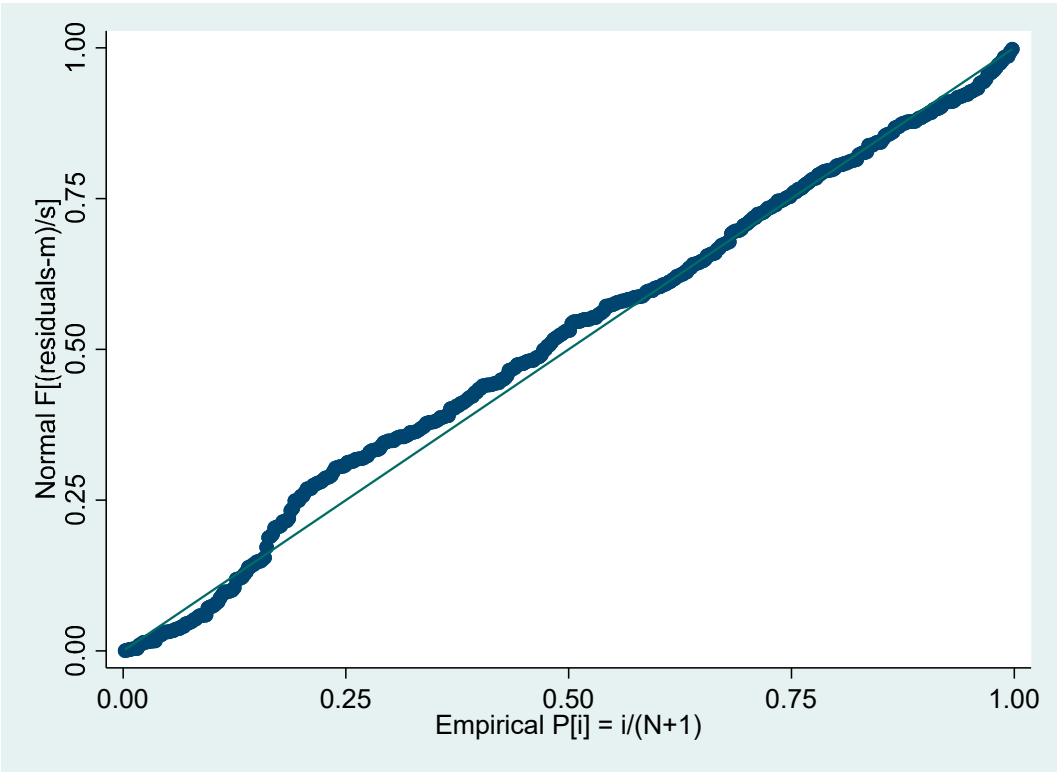

30'

|        |  |          |              |            |       |
|--------|--|----------|--------------|------------|-------|
|        |  |          | Delta-method | Bonferroni |       |
|        |  | Contrast | std. err.    | z          | P> z  |
|        |  |          |              |            |       |
| dose   |  |          |              |            |       |
| 1 vs 0 |  | 4.550761 | 2.518401     | 1.81       | 0.708 |

|        |  |           |          |       |       |
|--------|--|-----------|----------|-------|-------|
| 2 vs 0 |  | 5.822847  | 2.508747 | 2.32  | 0.203 |
| 3 vs 0 |  | -2.556871 | 2.515049 | -1.02 | 1.000 |
| 4 vs 0 |  | -16.23926 | 2.525085 | -6.43 | 0.000 |
| 2 vs 1 |  | 1.272086  | 2.513871 | 0.51  | 1.000 |
| 3 vs 1 |  | -7.107631 | 2.508423 | -2.83 | 0.046 |
| 4 vs 1 |  | -20.79002 | 2.50893  | -8.29 | 0.000 |
| 3 vs 2 |  | -8.379717 | 2.511441 | -3.34 | 0.008 |
| 4 vs 2 |  | -22.06211 | 2.519093 | -8.76 | 0.000 |
| 4 vs 3 |  | -13.68239 | 2.510312 | -5.45 | 0.000 |

60'

|        |  | Delta-method |           | Bonferroni |       |
|--------|--|--------------|-----------|------------|-------|
|        |  | Contrast     | std. err. | z          | P> z  |
| dose   |  |              |           |            |       |
| 1 vs 0 |  | 7.235668     | 3.008677  | 2.40       | 0.162 |
| 2 vs 0 |  | -5.26926     | 3.00006   | -1.76      | 0.791 |
| 3 vs 0 |  | -22.67204    | 3.005871  | -7.54      | 0.000 |
| 4 vs 0 |  | -40.36187    | 3.014274  | -13.39     | 0.000 |
| 2 vs 1 |  | -12.50493    | 3.004886  | -4.16      | 0.000 |
| 3 vs 1 |  | -29.90771    | 3.00033   | -9.97      | 0.000 |
| 4 vs 1 |  | -47.59754    | 3.000754  | -15.86     | 0.000 |
| 3 vs 2 |  | -17.40278    | 3.002853  | -5.80      | 0.000 |
| 4 vs 2 |  | -35.09261    | 3.009256  | -11.66     | 0.000 |
| 4 vs 3 |  | -17.68983    | 3.001909  | -5.89      | 0.000 |

90'

|        |  | Delta-method |           | Bonferroni |       |
|--------|--|--------------|-----------|------------|-------|
|        |  | Contrast     | std. err. | z          | P> z  |
| dose   |  |              |           |            |       |
| 1 vs 0 |  | 2.090539     | 2.483316  | 0.84       | 1.000 |
| 2 vs 0 |  | -27.78881    | 2.473525  | -11.23     | 0.000 |
| 3 vs 0 |  | -49.3727     | 2.479916  | -19.91     | 0.000 |

|        |  |           |          |        |       |
|--------|--|-----------|----------|--------|-------|
| 4 vs 0 |  | -65.56401 | 2.490094 | -26.33 | 0.000 |
| 2 vs 1 |  | -29.87935 | 2.478721 | -12.05 | 0.000 |
| 3 vs 1 |  | -51.46324 | 2.473196 | -20.81 | 0.000 |
| 4 vs 1 |  | -67.65455 | 2.473711 | -27.35 | 0.000 |
| 3 vs 2 |  | -21.58389 | 2.476257 | -8.72  | 0.000 |
| 4 vs 2 |  | -37.7752  | 2.484018 | -15.21 | 0.000 |
| 4 vs 3 |  | -16.19131 | 2.475112 | -6.54  | 0.000 |

120'

|        |  | Delta-method |           | Bonferroni |       |
|--------|--|--------------|-----------|------------|-------|
|        |  | Contrast     | std. err. | z          | P> z  |
| dose   |  |              |           |            |       |
| 1 vs 0 |  | -2.123505    | 3.068395  | -0.69      | 1.000 |
| 2 vs 0 |  | -38.97449    | 3.060477  | -12.73     | 0.000 |
| 3 vs 0 |  | -62.19558    | 3.065644  | -20.29     | 0.000 |
| 4 vs 0 |  | -76.59429    | 3.073884  | -24.92     | 0.000 |
| 2 vs 1 |  | -36.85098    | 3.064678  | -12.02     | 0.000 |
| 3 vs 1 |  | -60.07208    | 3.060211  | -19.63     | 0.000 |
| 4 vs 1 |  | -74.47079    | 3.060627  | -24.33     | 0.000 |
| 3 vs 2 |  | -23.2211     | 3.062685  | -7.58      | 0.000 |
| 4 vs 2 |  | -37.6198     | 3.068964  | -12.26     | 0.000 |
| 4 vs 3 |  | -14.39871    | 3.061759  | -4.70      | 0.000 |

180'

|        |  | Delta-method |           | Bonferroni |       |
|--------|--|--------------|-----------|------------|-------|
|        |  | Contrast     | std. err. | z          | P> z  |
| dose   |  |              |           |            |       |
| 1 vs 0 |  | 6.218007     | 3.068395  | 2.03       | 0.427 |
| 2 vs 0 |  | 4.603843     | 3.060476  | 1.50       | 1.000 |
| 3 vs 0 |  | -14.75771    | 3.065644  | -4.81      | 0.000 |
| 4 vs 0 |  | -34.75623    | 3.073883  | -11.31     | 0.000 |
| 2 vs 1 |  | -1.614164    | 3.064678  | -0.53      | 1.000 |
| 3 vs 1 |  | -20.97572    | 3.060211  | -6.85      | 0.000 |

|        |  |           |          |        |       |
|--------|--|-----------|----------|--------|-------|
| 4 vs 1 |  | -40.97424 | 3.060627 | -13.39 | 0.000 |
| 3 vs 2 |  | -19.36156 | 3.062685 | -6.32  | 0.000 |
| 4 vs 2 |  | -39.36007 | 3.068963 | -12.83 | 0.000 |
| 4 vs 3 |  | -19.99852 | 3.061759 | -6.53  | 0.000 |

-----

Figure 7. nSWDs

|                  |  | Coefficient | Std. err. | z     | P> z  | [95% conf. interval] |           |
|------------------|--|-------------|-----------|-------|-------|----------------------|-----------|
| dose             |  |             |           |       |       |                      |           |
| 1                |  | .6133868    | .5355905  | 1.15  | 0.252 | -.4363513            | 1.663125  |
| 2                |  | .6446382    | .5353292  | 1.20  | 0.229 | -.4045878            | 1.693864  |
| 3                |  | -.3284059   | .5353946  | -0.61 | 0.540 | -1.37776             | .7209482  |
| 4                |  | -.7431355   | .5353946  | -1.39 | 0.165 | -1.79249             | .3062186  |
|                  |  |             |           |       |       |                      |           |
| timeknot1        |  | -.0016524   | .0128459  | -0.13 | 0.898 | -.0268298            | .023525   |
| timeknot2        |  | .0439762    | .1170904  | 0.38  | 0.707 | -.1855168            | .2734692  |
| timeknot3        |  | -.2018499   | .3591164  | -0.56 | 0.574 | -.9057051            | .5020053  |
| timeknot4        |  | .3633957    | .4960206  | 0.73  | 0.464 | -.6087868            | 1.335578  |
| timeknot5        |  | -.3075988   | .4960205  | -0.62 | 0.535 | -1.279781            | .6645835  |
|                  |  |             |           |       |       |                      |           |
| dose#c.timeknot1 |  |             |           |       |       |                      |           |
| 1                |  | -.0420055   | .0181668  | -2.31 | 0.021 | -.0776118            | -.0063992 |
| 2                |  | -.0947146   | .0181668  | -5.21 | 0.000 | -.1303208            | -.0591083 |
| 3                |  | -.1249524   | .0181668  | -6.88 | 0.000 | -.1605587            | -.0893461 |
| 4                |  | -.1423946   | .0181668  | -7.84 | 0.000 | -.1780008            | -.1067883 |
|                  |  |             |           |       |       |                      |           |
| dose#c.timeknot2 |  |             |           |       |       |                      |           |
| 1                |  | .2538214    | .1655908  | 1.53  | 0.125 | -.0707307            | .5783735  |
| 2                |  | .3978218    | .1655908  | 2.40  | 0.016 | .0732697             | .7223739  |
| 3                |  | .6279414    | .1655908  | 3.79  | 0.000 | .3033893             | .9524936  |
| 4                |  | .6665306    | .1655908  | 4.03  | 0.000 | .3419784             | .9910827  |
|                  |  |             |           |       |       |                      |           |
| dose#c.timeknot3 |  |             |           |       |       |                      |           |
| 1                |  | -.4293999   | .5078673  | -0.85 | 0.398 | -1.424801            | .5660017  |
| 2                |  | -.1876883   | .5078673  | -0.37 | 0.712 | -1.18309             | .8077133  |
| 3                |  | -.9036875   | .5078673  | -1.78 | 0.075 | -1.899089            | .0917141  |
| 4                |  | -.8738586   | .5078673  | -1.72 | 0.085 | -1.86926             | .121543   |
|                  |  |             |           |       |       |                      |           |
| dose#c.timeknot4 |  |             |           |       |       |                      |           |
| 1                |  | -.2017686   | .701479   | -0.29 | 0.774 | -1.576642            | 1.173105  |

|                  |  |           |          |       |       |           |           |
|------------------|--|-----------|----------|-------|-------|-----------|-----------|
| 2                |  | -1.767701 | .701479  | -2.52 | 0.012 | -3.142575 | -.3928274 |
| 3                |  | -.5361369 | .701479  | -0.76 | 0.445 | -1.911011 | .8387368  |
| 4                |  | -.7293099 | .701479  | -1.04 | 0.298 | -2.104184 | .6455638  |
|                  |  |           |          |       |       |           |           |
| dose#c.timeknot5 |  |           |          |       |       |           |           |
| 1                |  | .9159831  | .7014789 | 1.31  | 0.192 | -.4588903 | 2.290856  |
| 2                |  | 2.978862  | .7014789 | 4.25  | 0.000 | 1.603989  | 4.353735  |
| 3                |  | 1.241109  | .7014789 | 1.77  | 0.077 | -.1337644 | 2.615982  |
| 4                |  | 1.329312  | .7014789 | 1.90  | 0.058 | -.0455615 | 2.704185  |
|                  |  |           |          |       |       |           |           |
| baseline         |  | .0400174  | .0669139 | 0.60  | 0.550 | -.0911314 | .1711662  |
| _cons            |  | 12.11016  | .9257188 | 13.08 | 0.000 | 10.29579  | 13.92454  |

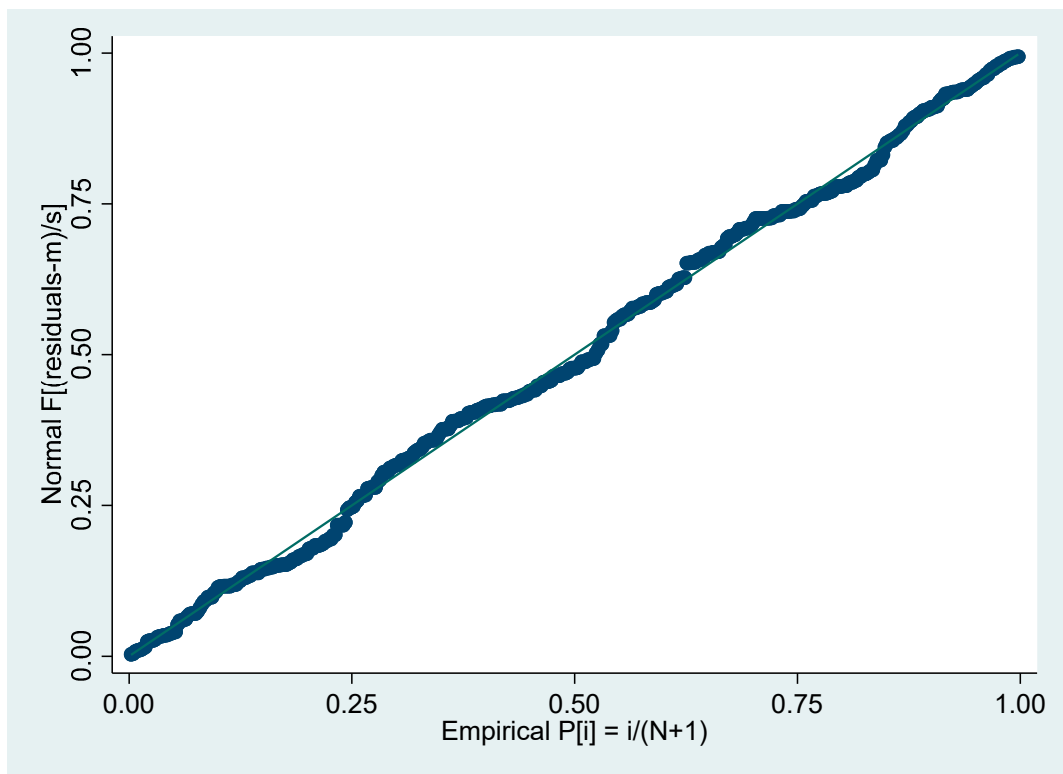

30'

|        |  | Delta-method |           | Bonferroni |       |
|--------|--|--------------|-----------|------------|-------|
|        |  | Contrast     | std. err. | z          | P> z  |
| dose   |  |              |           |            |       |
| 1 vs 0 |  | -.5706312    | .3551603  | -1.61      | 1.000 |
| 2 vs 0 |  | -2.077452    | .3547661  | -5.86      | 0.000 |

|        |  |           |          |        |       |
|--------|--|-----------|----------|--------|-------|
| 3 vs 0 |  | -3.888595 | .3548647 | -10.96 | 0.000 |
| 4 vs 0 |  | -4.815013 | .3548647 | -13.57 | 0.000 |
| 2 vs 1 |  | -1.506821 | .3551603 | -4.24  | 0.000 |
| 3 vs 1 |  | -3.317964 | .3548647 | -9.35  | 0.000 |
| 4 vs 1 |  | -4.244382 | .3556524 | -11.93 | 0.000 |
| 3 vs 2 |  | -1.811143 | .3548647 | -5.10  | 0.000 |
| 4 vs 2 |  | -2.737561 | .3548647 | -7.71  | 0.000 |
| 4 vs 3 |  | -.9264181 | .3551603 | -2.61  | 0.091 |

60'

|        |  | Delta-method |           | Bonferroni |       |
|--------|--|--------------|-----------|------------|-------|
|        |  | Contrast     | std. err. | z          | P> z  |
| dose   |  |              |           |            |       |
| 1 vs 0 |  | -1.297771    | .4246828  | -3.06      | 0.022 |
| 2 vs 0 |  | -4.083464    | .4243532  | -9.62      | 0.000 |
| 3 vs 0 |  | -6.31849     | .4244357  | -14.89     | 0.000 |
| 4 vs 0 |  | -7.687136    | .4244357  | -18.11     | 0.000 |
| 2 vs 1 |  | -2.785693    | .4246828  | -6.56      | 0.000 |
| 3 vs 1 |  | -5.020719    | .4244357  | -11.83     | 0.000 |
| 4 vs 1 |  | -6.389365    | .4250945  | -15.03     | 0.000 |
| 3 vs 2 |  | -2.235026    | .4244357  | -5.27      | 0.000 |
| 4 vs 2 |  | -3.603672    | .4244357  | -8.49      | 0.000 |
| 4 vs 3 |  | -1.368646    | .4246828  | -3.22      | 0.013 |

90'

|        |  | Delta-method |           | Bonferroni |       |
|--------|--|--------------|-----------|------------|-------|
|        |  | Contrast     | std. err. | z          | P> z  |
| dose   |  |              |           |            |       |
| 1 vs 0 |  | -1.239973    | .3501825  | -3.54      | 0.004 |
| 2 vs 0 |  | -4.713623    | .3497827  | -13.48     | 0.000 |
| 3 vs 0 |  | -6.758901    | .3498827  | -19.32     | 0.000 |
| 4 vs 0 |  | -8.421906    | .3498827  | -24.07     | 0.000 |
| 2 vs 1 |  | -3.47365     | .3501825  | -9.92      | 0.000 |
| 3 vs 1 |  | -5.518928    | .3498827  | -15.77     | 0.000 |



|        |  |           |          |        |       |
|--------|--|-----------|----------|--------|-------|
| 4 vs 1 |  | -7.181933 | .3506816 | -20.48 | 0.000 |
| 3 vs 2 |  | -2.045278 | .3498827 | -5.85  | 0.000 |
| 4 vs 2 |  | -3.708283 | .3498827 | -10.60 | 0.000 |
| 4 vs 3 |  | -1.663005 | .3501825 | -4.75  | 0.000 |

120'

|        |  | Delta-method |           | Bonferroni |       |
|--------|--|--------------|-----------|------------|-------|
|        |  | Contrast     | std. err. | z          | P> z  |
| dose   |  |              |           |            |       |
| 1 vs 0 |  | -.584459     | .4331473  | -1.35      | 1.000 |
| 2 vs 0 |  | -3.533384    | .4328241  | -8.16      | 0.000 |
| 3 vs 0 |  | -5.435066    | .4329049  | -12.55     | 0.000 |
| 4 vs 0 |  | -7.130357    | .4329049  | -16.47     | 0.000 |
| 2 vs 1 |  | -2.948925    | .4331473  | -6.81      | 0.000 |
| 3 vs 1 |  | -4.850607    | .4329049  | -11.20     | 0.000 |
| 4 vs 1 |  | -6.545898    | .4335509  | -15.10     | 0.000 |
| 3 vs 2 |  | -1.901682    | .4329049  | -4.39      | 0.000 |
| 4 vs 2 |  | -3.596973    | .4329049  | -8.31      | 0.000 |
| 4 vs 3 |  | -1.695291    | .4331473  | -3.91      | 0.001 |

180'

|        |  | Delta-method |           | Bonferroni |       |
|--------|--|--------------|-----------|------------|-------|
|        |  | Contrast     | std. err. | z          | P> z  |
| dose   |  |              |           |            |       |
| 1 vs 0 |  | .7713075     | .4331473  | 1.78       | 0.750 |
| 2 vs 0 |  | 1.528769     | .4328241  | 3.53       | 0.004 |
| 3 vs 0 |  | -.7667566    | .4329049  | -1.77      | 0.765 |
| 4 vs 0 |  | -1.711405    | .4329049  | -3.95      | 0.001 |
| 2 vs 1 |  | .7574618     | .4331473  | 1.75       | 0.803 |
| 3 vs 1 |  | -1.538064    | .4329049  | -3.55      | 0.004 |
| 4 vs 1 |  | -2.482713    | .4335509  | -5.73      | 0.000 |
| 3 vs 2 |  | -2.295526    | .4329049  | -5.30      | 0.000 |
| 4 vs 2 |  | -3.240175    | .4329049  | -7.48      | 0.000 |
| 4 vs 3 |  | -.9446487    | .4331473  | -2.18      | 0.292 |



Figure 8. dSWDs

|                  |  | Coefficient | Std. err. | z     | P> z  | [95% conf. interval] |           |
|------------------|--|-------------|-----------|-------|-------|----------------------|-----------|
| dose             |  |             |           |       |       |                      |           |
| 1                |  | -4.805695   | 5.192424  | -0.93 | 0.355 | -14.98266            | 5.371268  |
| 2                |  | -3.999888   | 5.191055  | -0.77 | 0.441 | -14.17417            | 6.174394  |
| 3                |  | -1.078384   | 5.194581  | -0.21 | 0.836 | -11.25958            | 9.102808  |
|                  |  |             |           |       |       |                      |           |
| timeknot1        |  | -.131423    | .1244766  | -1.06 | 0.291 | -.3753927            | .1125467  |
| timeknot2        |  | 1.317873    | 1.134608  | 1.16  | 0.245 | -.9059174            | 3.541663  |
| timeknot3        |  | -3.905106   | 3.479842  | -1.12 | 0.262 | -10.72547            | 2.91526   |
| timeknot4        |  | 4.430392    | 4.806446  | 0.92  | 0.357 | -4.990068            | 13.85085  |
| timeknot5        |  | -2.196626   | 4.806445  | -0.46 | 0.648 | -11.61708            | 7.223833  |
|                  |  |             |           |       |       |                      |           |
| dose#c.timeknot1 |  |             |           |       |       |                      |           |
| 1                |  | -.2187311   | .1760365  | -1.24 | 0.214 | -.5637564            | .1262942  |
| 2                |  | -.1621575   | .1760365  | -0.92 | 0.357 | -.5071827            | .1828678  |
| 3                |  | .0836232    | .1760365  | 0.48  | 0.635 | -.2614021            | .4286484  |
|                  |  |             |           |       |       |                      |           |
| dose#c.timeknot2 |  |             |           |       |       |                      |           |
| 1                |  | .2353414    | 1.604577  | 0.15  | 0.883 | -2.909573            | 3.380255  |
| 2                |  | 3.248002    | 1.604577  | 2.02  | 0.043 | .1030879             | 6.392916  |
| 3                |  | -1.635003   | 1.604577  | -1.02 | 0.308 | -4.779916            | 1.509911  |
|                  |  |             |           |       |       |                      |           |
| dose#c.timeknot3 |  |             |           |       |       |                      |           |
| 1                |  | 2.333653    | 4.92124   | 0.47  | 0.635 | -7.311801            | 11.97911  |
| 2                |  | -10.65078   | 4.92124   | -2.16 | 0.030 | -20.29624            | -1.005329 |
| 3                |  | 4.391356    | 4.92124   | 0.89  | 0.372 | -5.254098            | 14.03681  |
|                  |  |             |           |       |       |                      |           |
| dose#c.timeknot4 |  |             |           |       |       |                      |           |
| 1                |  | -8.149409   | 6.797341  | -1.20 | 0.231 | -21.47195            | 5.173134  |
| 2                |  | 13.03697    | 6.797341  | 1.92  | 0.055 | -.2855691            | 26.35952  |
| 3                |  | -1.650386   | 6.797341  | -0.24 | 0.808 | -14.97293            | 11.67216  |
|                  |  |             |           |       |       |                      |           |
| dose#c.timeknot5 |  |             |           |       |       |                      |           |

|          |  |           |          |       |       |           |          |
|----------|--|-----------|----------|-------|-------|-----------|----------|
| 1        |  | 9.425291  | 6.797339 | 1.39  | 0.166 | -3.897249 | 22.74783 |
| 2        |  | -6.632795 | 6.797339 | -0.98 | 0.329 | -19.95534 | 6.689746 |
| 3        |  | -6.326606 | 6.797339 | -0.93 | 0.352 | -19.64915 | 6.995934 |
|          |  |           |          |       |       |           |          |
| baseline |  | .0675929  | .0809011 | 0.84  | 0.403 | -.0909703 | .2261561 |
| _cons    |  | 102.1248  | 9.234152 | 11.06 | 0.000 | 84.02623  | 120.2234 |

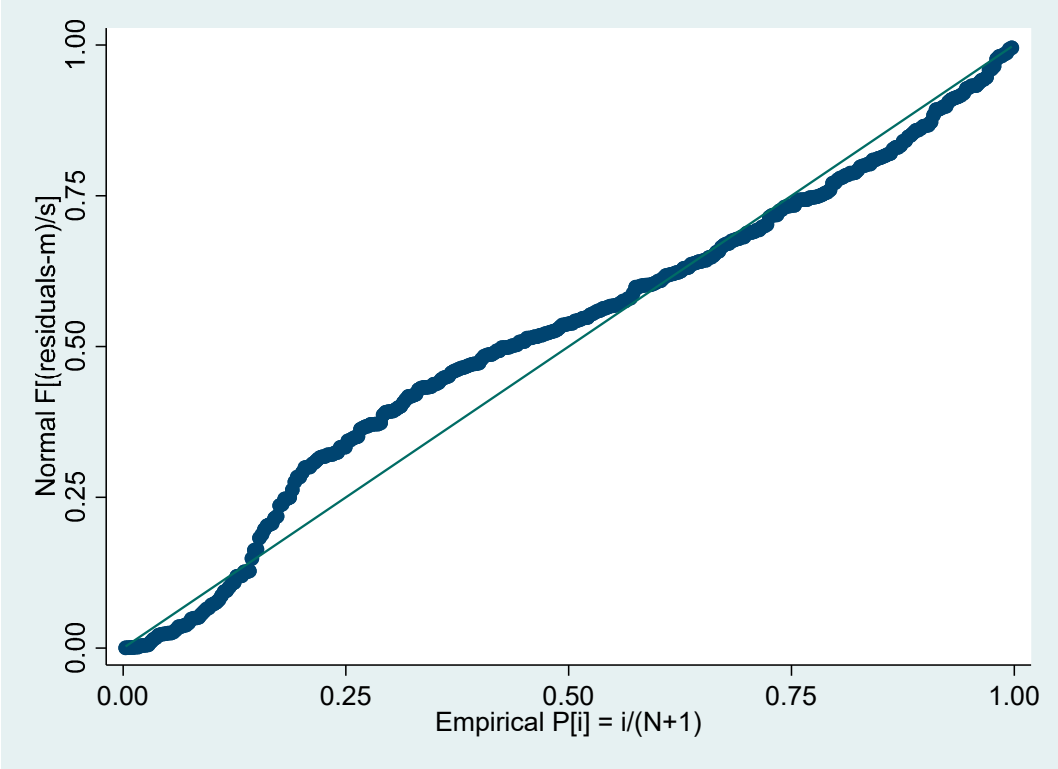

30'

|        |  |              |           |            |       |
|--------|--|--------------|-----------|------------|-------|
|        |  | Delta-method |           | Bonferroni |       |
|        |  | Contrast     | std. err. | z          | P> z  |
| -----+ |  |              |           |            |       |
| dose   |  |              |           |            |       |
| 1 vs 0 |  | -11.29703    | 3.445344  | -3.28      | 0.006 |
| 2 vs 0 |  | -7.890212    | 3.443281  | -2.29      | 0.132 |
| 3 vs 0 |  | .9398103     | 3.448594  | 0.27       | 1.000 |
| 2 vs 1 |  | 3.406814     | 3.43785   | 0.99       | 1.000 |
| 3 vs 1 |  | 12.23684     | 3.437976  | 3.56       | 0.002 |
| 3 vs 2 |  | 8.830022     | 3.43857   | 2.57       | 0.061 |

.

60'

| -----       |  |              |           |             |
|-------------|--|--------------|-----------|-------------|
|             |  | Delta-method |           | Bonferroni  |
|             |  | Contrast     | std. err. | z P> z      |
| -----+----- |  |              |           |             |
| dose        |  |              |           |             |
| 1 vs 0      |  | -17.36474    | 4.118391  | -4.22 0.000 |
| 2 vs 0      |  | -5.934132    | 4.116666  | -1.44 0.897 |
| 3 vs 0      |  | .0149999     | 4.12111   | 0.00 1.000  |
| 2 vs 1      |  | 11.43061     | 4.112124  | 2.78 0.033  |
| 3 vs 1      |  | 17.37974     | 4.112229  | 4.23 0.000  |
| 3 vs 2      |  | 5.949131     | 4.112725  | 1.45 0.888  |

90'

| -----       |  |              |           |             |
|-------------|--|--------------|-----------|-------------|
|             |  | Delta-method |           | Bonferroni  |
|             |  | Contrast     | std. err. | z P> z      |
| -----+----- |  |              |           |             |
| dose        |  |              |           |             |
| 1 vs 0      |  | -21.88513    | 3.397163  | -6.44 0.000 |
| 2 vs 0      |  | 4.519521     | 3.395071  | 1.33 1.000  |
| 3 vs 0      |  | -5.478413    | 3.40046   | -1.61 0.643 |
| 2 vs 1      |  | 26.40465     | 3.389563  | 7.79 0.000  |
| 3 vs 1      |  | 16.40672     | 3.38969   | 4.84 0.000  |
| 3 vs 2      |  | -9.997934    | 3.390293  | -2.95 0.019 |

120'

| -----       |  |              |           |             |
|-------------|--|--------------|-----------|-------------|
|             |  | Delta-method |           | Bonferroni  |
|             |  | Contrast     | std. err. | z P> z      |
| -----+----- |  |              |           |             |
| dose        |  |              |           |             |
| 1 vs 0      |  | -20.9341     | 4.200349  | -4.98 0.000 |
| 2 vs 0      |  | 13.34097     | 4.198657  | 3.18 0.009  |
| 3 vs 0      |  | -11.8964     | 4.203015  | -2.83 0.028 |
| 2 vs 1      |  | 34.27508     | 4.194204  | 8.17 0.000  |
| 3 vs 1      |  | 9.037705     | 4.194307  | 2.15 0.187  |
| 3 vs 2      |  | -25.23737    | 4.194794  | -6.02 0.000 |

-----  
180'  
-----

|             |  | Delta-method |           | Bonferroni |       |
|-------------|--|--------------|-----------|------------|-------|
|             |  | Contrast     | std. err. | z          | P> z  |
| -----+----- |  |              |           |            |       |
| dose        |  |              |           |            |       |
| 1 vs 0      |  | -3.679608    | 4.200349  | -0.88      | 1.000 |
| 2 vs 0      |  | 4.075992     | 4.198657  | 0.97       | 1.000 |
| 3 vs 0      |  | -11.62127    | 4.203015  | -2.76      | 0.034 |
| 2 vs 1      |  | 7.7556       | 4.194204  | 1.85       | 0.387 |
| 3 vs 1      |  | -7.941663    | 4.194307  | -1.89      | 0.350 |
| 3 vs 2      |  | -15.69726    | 4.194794  | -3.74      | 0.001 |
| -----       |  |              |           |            |       |

Figure 8. nSWDs

|                  |  | Coefficient | Std. err. | z      | P> z  | [95% conf. interval] |           |
|------------------|--|-------------|-----------|--------|-------|----------------------|-----------|
| dose             |  |             |           |        |       |                      |           |
| 1                |  | 2.364684    | .5974023  | 3.96   | 0.000 | 1.193797             | 3.535571  |
| 2                |  | -1.192192   | .5977221  | -1.99  | 0.046 | -2.363706            | -.0206783 |
| 3                |  | .1560199    | .5977221  | 0.26   | 0.794 | -1.015494            | 1.327534  |
|                  |  |             |           |        |       |                      |           |
| timeknot1        |  | .0014864    | .0143292  | 0.10   | 0.917 | -.0265984            | .0295712  |
| timeknot2        |  | -.0224368   | .1306114  | -0.17  | 0.864 | -.2784305            | .2335569  |
| timeknot3        |  | .0658706    | .4005853  | 0.16   | 0.869 | -.7192623            | .8510034  |
| timeknot4        |  | -.0394331   | .5532985  | -0.07  | 0.943 | -1.123878            | 1.045012  |
| timeknot5        |  | -.066727    | .5532984  | -0.12  | 0.904 | -1.151172            | 1.017718  |
|                  |  |             |           |        |       |                      |           |
| dose#c.timeknot1 |  |             |           |        |       |                      |           |
| 1                |  | -.037023    | .0202646  | -1.83  | 0.068 | -.0767409            | .0026949  |
| 2                |  | -.0717016   | .0202646  | -3.54  | 0.000 | -.1114195            | -.0319837 |
| 3                |  | -.2197165   | .0202646  | -10.84 | 0.000 | -.2594344            | -.1799986 |
|                  |  |             |           |        |       |                      |           |
| dose#c.timeknot2 |  |             |           |        |       |                      |           |
| 1                |  | .2309098    | .1847124  | 1.25   | 0.211 | -.1311199            | .5929396  |
| 2                |  | .1387366    | .1847124  | 0.75   | 0.453 | -.2232931            | .5007663  |
| 3                |  | 1.385215    | .1847124  | 7.50   | 0.000 | 1.023185             | 1.747245  |
|                  |  |             |           |        |       |                      |           |
| dose#c.timeknot3 |  |             |           |        |       |                      |           |
| 1                |  | -.532346    | .5665132  | -0.94  | 0.347 | -1.642691            | .5779995  |
| 2                |  | .5022199    | .5665132  | 0.89   | 0.375 | -.6081256            | 1.612565  |
| 3                |  | -3.001431   | .5665132  | -5.30  | 0.000 | -4.111776            | -1.891085 |
|                  |  |             |           |        |       |                      |           |
| dose#c.timeknot4 |  |             |           |        |       |                      |           |
| 1                |  | .1734434    | .7824823  | 0.22   | 0.825 | -1.360194            | 1.70708   |
| 2                |  | -2.051956   | .7824823  | -2.62  | 0.009 | -3.585593            | -.5183192 |
| 3                |  | 1.922871    | .7824823  | 2.46   | 0.014 | .3892337             | 3.456508  |
|                  |  |             |           |        |       |                      |           |
| dose#c.timeknot5 |  |             |           |        |       |                      |           |

|          |  |           |          |       |       |           |          |
|----------|--|-----------|----------|-------|-------|-----------|----------|
| 1        |  | .611137   | .7824821 | 0.78  | 0.435 | -.9224998 | 2.144774 |
| 2        |  | 1.95513   | .7824821 | 2.50  | 0.012 | .4214931  | 3.488767 |
| 3        |  | -.8396296 | .7824821 | -1.07 | 0.283 | -2.373266 | .6940072 |
|          |  |           |          |       |       |           |          |
| baseline |  | -.0748663 | .0699457 | -1.07 | 0.284 | -.2119573 | .0622247 |
| _cons    |  | 13.12329  | .9473914 | 13.85 | 0.000 | 11.26644  | 14.98014 |

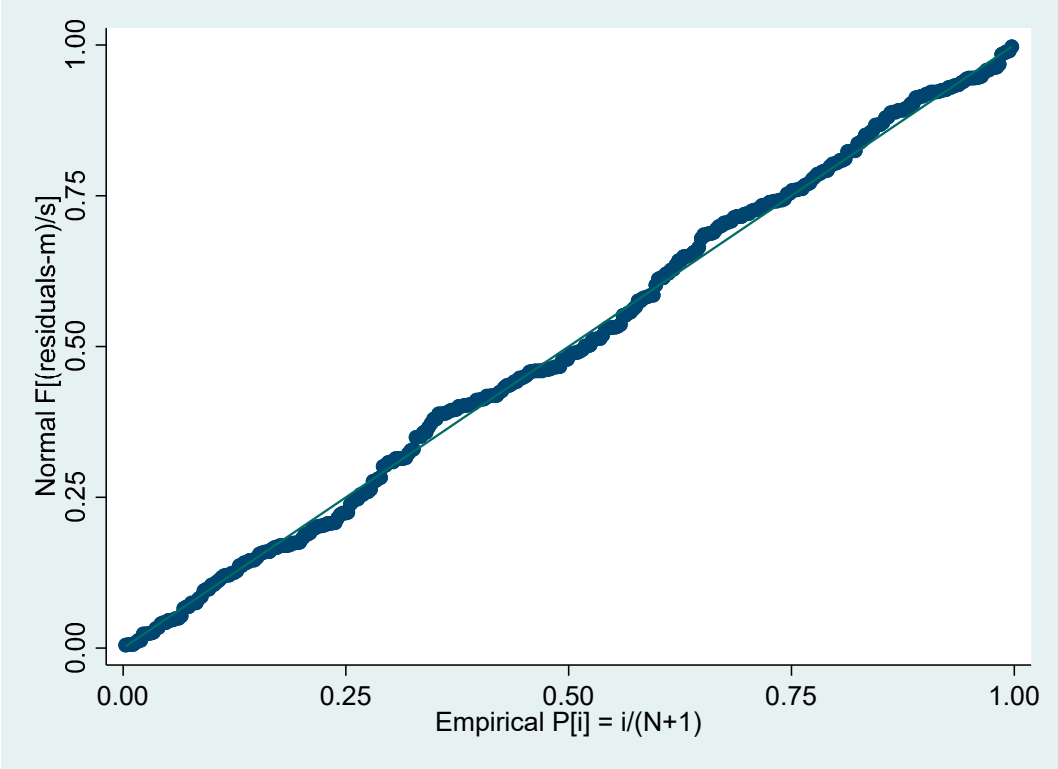

30'

|        |  | Delta-method |           | Bonferroni |       |
|--------|--|--------------|-----------|------------|-------|
|        |  | Contrast     | std. err. | z          | P> z  |
| dose   |  |              |           |            |       |
| 1 vs 0 |  | 1.323268     | .3961188  | 3.34       | 0.005 |
| 2 vs 0 |  | -3.301618    | .396601   | -8.32      | 0.000 |
| 3 vs 0 |  | -6.019912    | .396601   | -15.18     | 0.000 |
| 2 vs 1 |  | -4.624887    | .39814    | -11.62     | 0.000 |
| 3 vs 1 |  | -7.34318     | .39814    | -18.44     | 0.000 |
| 3 vs 2 |  | -2.718293    | .3957327  | -6.87      | 0.000 |

.



60'

| -----       |  |              |           |              |
|-------------|--|--------------|-----------|--------------|
|             |  | Delta-method |           | Bonferroni   |
|             |  | Contrast     | std. err. | z P> z       |
| -----+----- |  |              |           |              |
| dose        |  |              |           |              |
| 1 vs 0      |  | .6974901     | .4736783  | 1.47 0.845   |
| 2 vs 0      |  | -5.161319    | .4740815  | -10.89 0.000 |
| 3 vs 0      |  | -9.702456    | .4740815  | -20.47 0.000 |
| 2 vs 1      |  | -5.858809    | .4753698  | -12.32 0.000 |
| 3 vs 1      |  | -10.39995    | .4753698  | -21.88 0.000 |
| 3 vs 2      |  | -4.541137    | .4733554  | -9.59 0.000  |

90'

| -----       |  |              |           |              |
|-------------|--|--------------|-----------|--------------|
|             |  | Delta-method |           | Bonferroni   |
|             |  | Contrast     | std. err. | z P> z       |
| -----+----- |  |              |           |              |
| dose        |  |              |           |              |
| 1 vs 0      |  | .7432835     | .3905654  | 1.90 0.342   |
| 2 vs 0      |  | -6.370901    | .3910544  | -16.29 0.000 |
| 3 vs 0      |  | -9.298654    | .3910544  | -23.78 0.000 |
| 2 vs 1      |  | -7.114185    | .3926152  | -18.12 0.000 |
| 3 vs 1      |  | -10.04194    | .3926152  | -25.58 0.000 |
| 3 vs 2      |  | -2.927753    | .3901738  | -7.50 0.000  |

120'

| -----       |  |              |           |              |
|-------------|--|--------------|-----------|--------------|
|             |  | Delta-method |           | Bonferroni   |
|             |  | Contrast     | std. err. | z P> z       |
| -----+----- |  |              |           |              |
| dose        |  |              |           |              |
| 1 vs 0      |  | 1.077767     | .483121   | 2.23 0.154   |
| 2 vs 0      |  | -5.92731     | .4835164  | -12.26 0.000 |
| 3 vs 0      |  | -6.817266    | .4835164  | -14.10 0.000 |
| 2 vs 1      |  | -7.005078    | .4847796  | -14.45 0.000 |
| 3 vs 1      |  | -7.895033    | .4847796  | -16.29 0.000 |
| 3 vs 2      |  | -.8899556    | .4828045  | -1.84 0.392  |

-----  
180'  
-----

|             |  | Delta-method |           | Bonferroni |       |
|-------------|--|--------------|-----------|------------|-------|
|             |  | Contrast     | std. err. | z          | P> z  |
| -----+----- |  |              |           |            |       |
| dose        |  |              |           |            |       |
| 1 vs 0      |  | .8587294     | .483121   | 1.78       | 0.453 |
| 2 vs 0      |  | -.3904153    | .4835164  | -0.81      | 1.000 |
| 3 vs 0      |  | -2.64359     | .4835164  | -5.47      | 0.000 |
| 2 vs 1      |  | -1.249145    | .4847795  | -2.58      | 0.060 |
| 3 vs 1      |  | -3.502319    | .4847795  | -7.22      | 0.000 |
| 3 vs 2      |  | -2.253175    | .4828044  | -4.67      | 0.000 |

-----

Figure 9. dSWDs

|                  |  | Coefficient | Std. err. | z     | P> z  | [95% conf. interval] |          |
|------------------|--|-------------|-----------|-------|-------|----------------------|----------|
| dose             |  |             |           |       |       |                      |          |
| 1                |  | 6.327237    | 4.277689  | 1.48  | 0.139 | -2.05688             | 14.71135 |
| 2                |  | 13.17785    | 4.253987  | 3.10  | 0.002 | 4.840193             | 21.51552 |
| 3                |  | 9.300857    | 4.251238  | 2.19  | 0.029 | .968583              | 17.63313 |
|                  |  |             |           |       |       |                      |          |
| timeknot1        |  | .0426707    | .1000482  | 0.43  | 0.670 | -.1534202            | .2387617 |
| timeknot2        |  | -.1810587   | .9119422  | -0.20 | 0.843 | -1.968433            | 1.606315 |
| timeknot3        |  | .0088317    | 2.796928  | 0.00  | 0.997 | -5.473046            | 5.490709 |
| timeknot4        |  | 1.413905    | 3.863186  | 0.37  | 0.714 | -6.157802            | 8.985611 |
| timeknot5        |  | -2.727484   | 3.863186  | -0.71 | 0.480 | -10.29919            | 4.844221 |
|                  |  |             |           |       |       |                      |          |
| dose#c.timeknot1 |  |             |           |       |       |                      |          |
| 1                |  | .0422242    | .1414896  | 0.30  | 0.765 | -.2350903            | .3195387 |
| 2                |  | .1999998    | .1414896  | 1.41  | 0.157 | -.0773146            | .4773143 |
| 3                |  | .1235055    | .1414896  | 0.87  | 0.383 | -.153809             | .4008199 |
|                  |  |             |           |       |       |                      |          |
| dose#c.timeknot2 |  |             |           |       |       |                      |          |
| 1                |  | -1.001879   | 1.289681  | -0.78 | 0.437 | -3.529608            | 1.525849 |
| 2                |  | -2.036923   | 1.289681  | -1.58 | 0.114 | -4.564651            | .4908054 |
| 3                |  | -1.10319    | 1.289681  | -0.86 | 0.392 | -3.630918            | 1.424538 |
|                  |  |             |           |       |       |                      |          |
| dose#c.timeknot3 |  |             |           |       |       |                      |          |
| 1                |  | 3.807644    | 3.955453  | 0.96  | 0.336 | -3.944901            | 11.56019 |
| 2                |  | 6.533911    | 3.955453  | 1.65  | 0.099 | -1.218634            | 14.28646 |
| 3                |  | 3.731729    | 3.955453  | 0.94  | 0.345 | -4.020816            | 11.48427 |
|                  |  |             |           |       |       |                      |          |
| dose#c.timeknot4 |  |             |           |       |       |                      |          |
| 1                |  | -5.990418   | 5.463371  | -1.10 | 0.273 | -16.69843            | 4.717591 |
| 2                |  | -9.960113   | 5.463371  | -1.82 | 0.068 | -20.66812            | .7478973 |
| 3                |  | -6.64745    | 5.463371  | -1.22 | 0.224 | -17.35546            | 4.06056  |
|                  |  |             |           |       |       |                      |          |
| dose#c.timeknot5 |  |             |           |       |       |                      |          |

|          |  |          |          |       |       |           |          |
|----------|--|----------|----------|-------|-------|-----------|----------|
| 1        |  | 4.661036 | 5.46337  | 0.85  | 0.394 | -6.046972 | 15.36904 |
| 2        |  | 10.12658 | 5.46337  | 1.85  | 0.064 | -.5814269 | 20.83459 |
| 3        |  | 8.096992 | 5.46337  | 1.48  | 0.138 | -2.611016 | 18.805   |
|          |  |          |          |       |       |           |          |
| baseline |  | .0548594 | .0850084 | 0.65  | 0.519 | -.1117541 | .2214728 |
| _cons    |  | 97.7322  | 9.447617 | 10.34 | 0.000 | 79.21521  | 116.2492 |

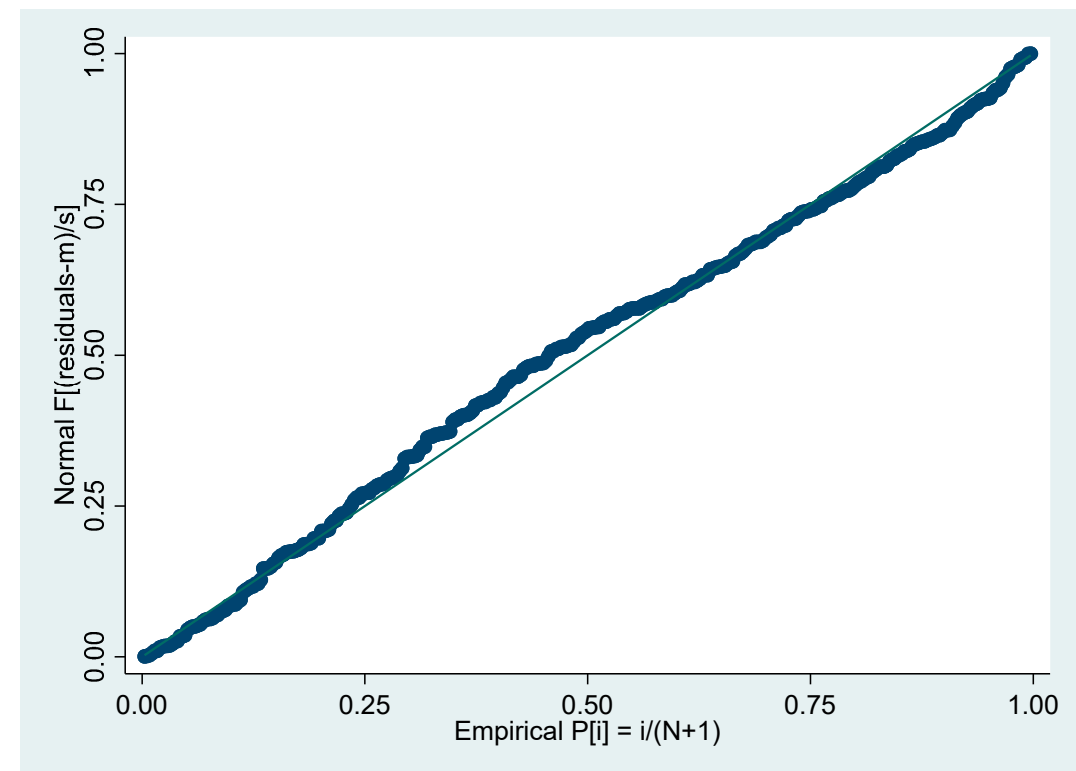

30'

|        |  | Delta-method |           | Bonferroni |       |
|--------|--|--------------|-----------|------------|-------|
|        |  | Contrast     | std. err. | z          | P> z  |
| dose   |  |              |           |            |       |
| 1 vs 0 |  | 7.293398     | 2.923984  | 2.49       | 0.076 |
| 2 vs 0 |  | 18.56677     | 2.889198  | 6.43       | 0.000 |
| 3 vs 0 |  | 12.67506     | 2.885149  | 4.39       | 0.000 |
| 2 vs 1 |  | 11.27337     | 2.901832  | 3.88       | 0.001 |
| 3 vs 1 |  | 5.381666     | 2.915457  | 1.85       | 0.389 |
| 3 vs 2 |  | -5.891709    | 2.886616  | -2.04      | 0.247 |

60'

| -----       |  |              |           |            |       |
|-------------|--|--------------|-----------|------------|-------|
|             |  | Delta-method |           | Bonferroni |       |
|             |  | Contrast     | std. err. | z          | P> z  |
| -----+----- |  |              |           |            |       |
| dose        |  |              |           |            |       |
| 1 vs 0      |  | 6.456178     | 3.440695  | 1.88       | 0.364 |
| 2 vs 0      |  | 20.28923     | 3.411183  | 5.95       | 0.000 |
| 3 vs 0      |  | 14.06353     | 3.407754  | 4.13       | 0.000 |
| 2 vs 1      |  | 13.83305     | 3.421891  | 4.04       | 0.000 |
| 3 vs 1      |  | 7.607351     | 3.433452  | 2.22       | 0.160 |
| 3 vs 2      |  | -6.225702    | 3.408996  | -1.83      | 0.407 |

90'

| -----       |  |              |           |            |       |
|-------------|--|--------------|-----------|------------|-------|
|             |  | Delta-method |           | Bonferroni |       |
|             |  | Contrast     | std. err. | z          | P> z  |
| -----+----- |  |              |           |            |       |
| dose        |  |              |           |            |       |
| 1 vs 0      |  | 3.154485     | 2.887335  | 1.09       | 1.000 |
| 2 vs 0      |  | 16.63894     | 2.852102  | 5.83       | 0.000 |
| 3 vs 0      |  | 12.60003     | 2.848001  | 4.42       | 0.000 |
| 2 vs 1      |  | 13.48445     | 2.8649    | 4.71       | 0.000 |
| 3 vs 1      |  | 9.445542     | 2.8787    | 3.28       | 0.006 |
| 3 vs 2      |  | -4.03891     | 2.849486  | -1.42      | 0.938 |

120'

| -----       |  |              |           |            |       |
|-------------|--|--------------|-----------|------------|-------|
|             |  | Delta-method |           | Bonferroni |       |
|             |  | Contrast     | std. err. | z          | P> z  |
| -----+----- |  |              |           |            |       |
| dose        |  |              |           |            |       |
| 1 vs 0      |  | 1.296404     | 3.504116  | 0.37       | 1.000 |
| 2 vs 0      |  | 13.7503      | 3.475142  | 3.96       | 0.000 |
| 3 vs 0      |  | 11.89641     | 3.471777  | 3.43       | 0.004 |
| 2 vs 1      |  | 12.4539      | 3.485654  | 3.57       | 0.002 |
| 3 vs 1      |  | 10.60001     | 3.497005  | 3.03       | 0.015 |
| 3 vs 2      |  | -1.85389     | 3.472996  | -0.53      | 1.000 |

-----  
180'  
-----

|             |  | Delta-method |           | Bonferroni |       |
|-------------|--|--------------|-----------|------------|-------|
|             |  | Contrast     | std. err. | z          | P> z  |
| -----+----- |  |              |           |            |       |
| dose        |  |              |           |            |       |
| 1 vs 0      |  | 7.735584     | 3.504116  | 2.21       | 0.164 |
| 2 vs 0      |  | 18.73204     | 3.475142  | 5.39       | 0.000 |
| 3 vs 0      |  | 15.74044     | 3.471777  | 4.53       | 0.000 |
| 2 vs 1      |  | 10.99646     | 3.485653  | 3.15       | 0.010 |
| 3 vs 1      |  | 8.004852     | 3.497004  | 2.29       | 0.132 |
| 3 vs 2      |  | -2.991607    | 3.472996  | -0.86      | 1.000 |

-----

Figure 9. nSWDs

|                  |  | Coefficient | Std. err. | z     | P> z  | [95% conf. interval] |          |
|------------------|--|-------------|-----------|-------|-------|----------------------|----------|
| dose             |  |             |           |       |       |                      |          |
| 1                |  | -.5646768   | .6605432  | -0.85 | 0.393 | -1.859318            | .7299641 |
| 2                |  | .8829244    | .6572254  | 1.34  | 0.179 | -.4052138            | 2.171063 |
| 3                |  | .4552775    | .6572254  | 0.69  | 0.488 | -.8328607            | 1.743416 |
|                  |  |             |           |       |       |                      |          |
| timeknot1        |  | .0083207    | .0157069  | 0.53  | 0.596 | -.0224643            | .0391057 |
| timeknot2        |  | -.1030144   | .1431691  | -0.72 | 0.472 | -.3836206            | .1775919 |
| timeknot3        |  | .3323874    | .4390997  | 0.76  | 0.449 | -.5282322            | 1.193007 |
| timeknot4        |  | -.5130361   | .6064956  | -0.85 | 0.398 | -1.701746            | .6756733 |
| timeknot5        |  | .6382634    | .6064954  | 1.05  | 0.293 | -.5504458            | 1.826973 |
|                  |  |             |           |       |       |                      |          |
| dose#c.timeknot1 |  |             |           |       |       |                      |          |
| 1                |  | .0178013    | .022213   | 0.80  | 0.423 | -.0257353            | .0613379 |
| 2                |  | -.0027699   | .022213   | -0.12 | 0.901 | -.0463065            | .0407667 |
| 3                |  | .014114     | .022213   | 0.64  | 0.525 | -.0294226            | .0576506 |
|                  |  |             |           |       |       |                      |          |
| dose#c.timeknot2 |  |             |           |       |       |                      |          |
| 1                |  | -.1754896   | .2024717  | -0.87 | 0.386 | -.5723268            | .2213476 |
| 2                |  | .0904951    | .2024717  | 0.45  | 0.655 | -.3063421            | .4873322 |
| 3                |  | -.0181085   | .2024717  | -0.09 | 0.929 | -.4149457            | .3787287 |
|                  |  |             |           |       |       |                      |          |
| dose#c.timeknot3 |  |             |           |       |       |                      |          |
| 1                |  | .4959327    | .6209808  | 0.80  | 0.425 | -.7211673            | 1.713033 |
| 2                |  | -.3683754   | .6209808  | -0.59 | 0.553 | -1.585475            | .8487246 |
| 3                |  | -.1692193   | .6209808  | -0.27 | 0.785 | -1.386319            | 1.047881 |
|                  |  |             |           |       |       |                      |          |
| dose#c.timeknot4 |  |             |           |       |       |                      |          |
| 1                |  | -.3992784   | .8577142  | -0.47 | 0.642 | -2.080367            | 1.281811 |
| 2                |  | .7348673    | .8577142  | 0.86  | 0.392 | -.9462218            | 2.415956 |
| 3                |  | .7678771    | .8577142  | 0.90  | 0.371 | -.9132119            | 2.448966 |
|                  |  |             |           |       |       |                      |          |
| dose#c.timeknot5 |  |             |           |       |       |                      |          |

|          |  |           |          |       |       |           |          |
|----------|--|-----------|----------|-------|-------|-----------|----------|
| 1        |  | -.2412654 | .8577141 | -0.28 | 0.778 | -1.922354 | 1.439823 |
| 2        |  | -1.160734 | .8577141 | -1.35 | 0.176 | -2.841823 | .5203547 |
| 3        |  | -1.36169  | .8577141 | -1.59 | 0.112 | -3.042779 | .3193985 |
|          |  |           |          |       |       |           |          |
| baseline |  | -.0354545 | .0591408 | -0.60 | 0.549 | -.1513684 | .0804593 |
| _cons    |  | 12.89556  | .8226703 | 15.68 | 0.000 | 11.28315  | 14.50796 |

-----

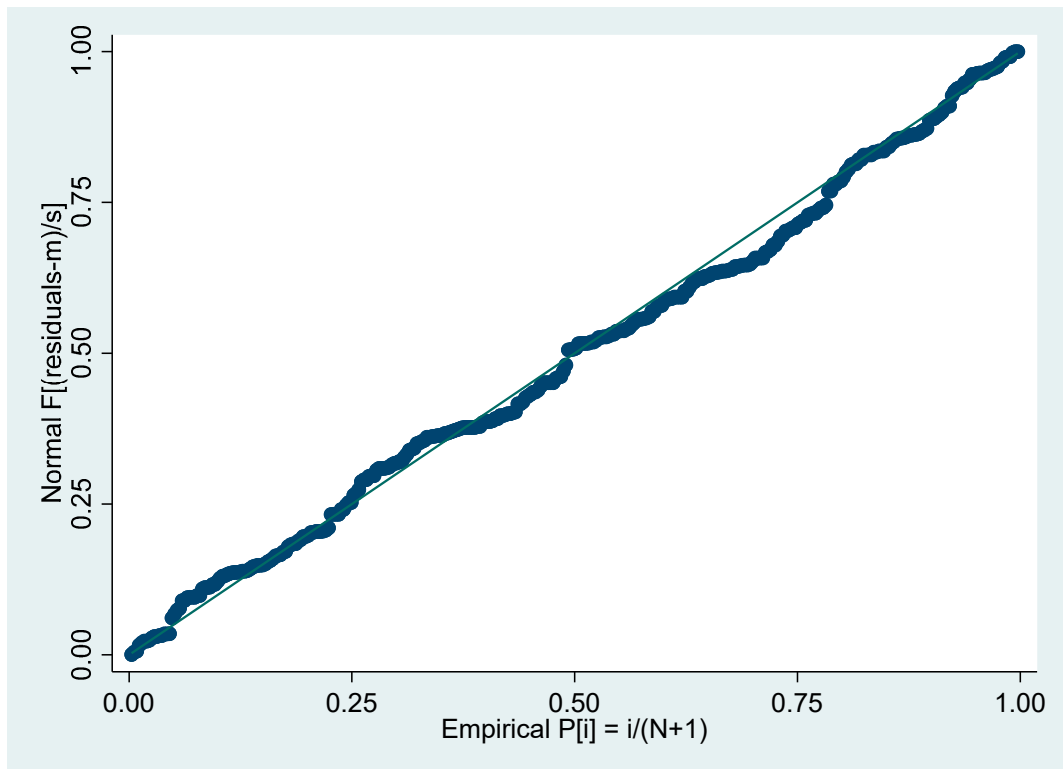

30'

-----

|        |  | Delta-method |           | Bonferroni |       |
|--------|--|--------------|-----------|------------|-------|
|        |  | Contrast     | std. err. | z          | P> z  |
| -----+ |  |              |           |            |       |
| dose   |  |              |           |            |       |
| 1 vs 0 |  | -.0832856    | .4427586  | -0.19      | 1.000 |
| 2 vs 0 |  | .8269763     | .4377935  | 1.89       | 0.353 |
| 3 vs 0 |  | .8732645     | .4377935  | 1.99       | 0.276 |
| 2 vs 1 |  | .9102619     | .4347872  | 2.09       | 0.218 |
| 3 vs 1 |  | .9565501     | .4347872  | 2.20       | 0.167 |
| 3 vs 2 |  | .0462882     | .4337805  | 0.11       | 1.000 |

-----



60'

| -----       |  |              |           |            |       |
|-------------|--|--------------|-----------|------------|-------|
|             |  | Delta-method |           | Bonferroni |       |
|             |  | Contrast     | std. err. | z          | P> z  |
| -----+----- |  |              |           |            |       |
| dose        |  |              |           |            |       |
| 1 vs 0      |  | .0822243     | .5263952  | 0.16       | 1.000 |
| 2 vs 0      |  | .9339194     | .5222259  | 1.79       | 0.442 |
| 3 vs 0      |  | 1.258656     | .5222259  | 2.41       | 0.096 |
| 2 vs 1      |  | .8516951     | .5197082  | 1.64       | 0.608 |
| 3 vs 1      |  | 1.176432     | .5197082  | 2.26       | 0.142 |
| 3 vs 2      |  | .3247368     | .5188663  | 0.63       | 1.000 |

90'

| -----       |  |              |           |            |       |
|-------------|--|--------------|-----------|------------|-------|
|             |  | Delta-method |           | Bonferroni |       |
|             |  | Contrast     | std. err. | z          | P> z  |
| -----+----- |  |              |           |            |       |
| dose        |  |              |           |            |       |
| 1 vs 0      |  | -.2352486    | .4367905  | -0.54      | 1.000 |
| 2 vs 0      |  | 1.256132     | .4317568  | 2.91       | 0.022 |
| 3 vs 0      |  | 1.528092     | .4317568  | 3.54       | 0.002 |
| 2 vs 1      |  | 1.491381     | .4287082  | 3.48       | 0.003 |
| 3 vs 1      |  | 1.76334      | .4287082  | 4.11       | 0.000 |
| 3 vs 2      |  | .2719595     | .4276871  | 0.64       | 1.000 |

120'

| -----       |  |              |           |            |       |
|-------------|--|--------------|-----------|------------|-------|
|             |  | Delta-method |           | Bonferroni |       |
|             |  | Contrast     | std. err. | z          | P> z  |
| -----+----- |  |              |           |            |       |
| dose        |  |              |           |            |       |
| 1 vs 0      |  | -.6076864    | .5366074  | -1.13      | 1.000 |
| 2 vs 0      |  | 1.403942     | .5325181  | 2.64       | 0.050 |
| 3 vs 0      |  | 1.395146     | .5325181  | 2.62       | 0.053 |
| 2 vs 1      |  | 2.011629     | .5300493  | 3.80       | 0.001 |
| 3 vs 1      |  | 2.002833     | .5300493  | 3.78       | 0.001 |
| 3 vs 2      |  | -.0087961    | .5292238  | -0.02      | 1.000 |

-----  
180'  
-----

|             |  | Delta-method |           | Bonferroni |       |
|-------------|--|--------------|-----------|------------|-------|
|             |  | Contrast     | std. err. | z          | P> z  |
| -----+----- |  |              |           |            |       |
| dose        |  |              |           |            |       |
| 1 vs 0      |  | -.1685349    | .5366074  | -0.31      | 1.000 |
| 2 vs 0      |  | .9392989     | .532518   | 1.76       | 0.467 |
| 3 vs 0      |  | .416259      | .532518   | 0.78       | 1.000 |
| 2 vs 1      |  | 1.107834     | .5300493  | 2.09       | 0.220 |
| 3 vs 1      |  | .5847939     | .5300493  | 1.10       | 1.000 |
| 3 vs 2      |  | -.5230399    | .5292238  | -0.99      | 1.000 |
| -----       |  |              |           |            |       |

Figure 10. dSWDs

|                  |  | Coefficient | Std. err. | z     | P> z  | [95% conf. interval] |           |
|------------------|--|-------------|-----------|-------|-------|----------------------|-----------|
| dose             |  |             |           |       |       |                      |           |
| 1                |  | 2.946703    | 4.374672  | 0.67  | 0.501 | -5.627496            | 11.5209   |
| 2                |  | 5.303087    | 4.357845  | 1.22  | 0.224 | -3.238132            | 13.8443   |
| 3                |  | 1.424236    | 4.38436   | 0.32  | 0.745 | -7.168953            | 10.01742  |
|                  |  |             |           |       |       |                      |           |
| timeknot1        |  | -.0908023   | .1045681  | -0.87 | 0.385 | -.295752             | .1141473  |
| timeknot2        |  | .9291245    | .9531406  | 0.97  | 0.330 | -.9389968            | 2.797246  |
| timeknot3        |  | -2.680256   | 2.923283  | -0.92 | 0.359 | -8.409786            | 3.049274  |
| timeknot4        |  | 2.239151    | 4.037712  | 0.55  | 0.579 | -5.674619            | 10.15292  |
| timeknot5        |  | 1.3107      | 4.037711  | 0.32  | 0.745 | -6.603069            | 9.224469  |
|                  |  |             |           |       |       |                      |           |
| dose#c.timeknot1 |  |             |           |       |       |                      |           |
| 1                |  | -.2077389   | .1478816  | -1.40 | 0.160 | -.4975815            | .0821037  |
| 2                |  | -.3894524   | .1478816  | -2.63 | 0.008 | -.679295             | -.0996098 |
| 3                |  | -.7663529   | .1478816  | -5.18 | 0.000 | -1.056195            | -.4765103 |
|                  |  |             |           |       |       |                      |           |
| dose#c.timeknot2 |  |             |           |       |       |                      |           |
| 1                |  | -3.216806   | 1.347944  | -2.39 | 0.017 | -5.858728            | -.5748834 |
| 2                |  | -3.439261   | 1.347944  | -2.55 | 0.011 | -6.081183            | -.7973382 |
| 3                |  | -.1127111   | 1.347944  | -0.08 | 0.933 | -2.754634            | 2.529211  |
|                  |  |             |           |       |       |                      |           |
| dose#c.timeknot3 |  |             |           |       |       |                      |           |
| 1                |  | 16.49216    | 4.134147  | 3.99  | 0.000 | 8.389381             | 24.59494  |
| 2                |  | 20.12789    | 4.134147  | 4.87  | 0.000 | 12.02511             | 28.23067  |
| 3                |  | 10.25274    | 4.134147  | 2.48  | 0.013 | 2.149962             | 18.35552  |
|                  |  |             |           |       |       |                      |           |
| dose#c.timeknot4 |  |             |           |       |       |                      |           |
| 1                |  | -29.683     | 5.710187  | -5.20 | 0.000 | -40.87476            | -18.49124 |
| 2                |  | -39.98473   | 5.710187  | -7.00 | 0.000 | -51.1765             | -28.79297 |
| 3                |  | -26.59469   | 5.710187  | -4.66 | 0.000 | -37.78645            | -15.40293 |
|                  |  |             |           |       |       |                      |           |
| dose#c.timeknot5 |  |             |           |       |       |                      |           |

|          |  |           |          |       |       |           |          |
|----------|--|-----------|----------|-------|-------|-----------|----------|
| 1        |  | 22.76216  | 5.710186 | 3.99  | 0.000 | 11.5704   | 33.95392 |
| 2        |  | 34.87015  | 5.710186 | 6.11  | 0.000 | 23.67839  | 46.06191 |
| 3        |  | 22.43915  | 5.710186 | 3.93  | 0.000 | 11.24739  | 33.63091 |
|          |  |           |          |       |       |           |          |
| baseline |  | -.0086992 | .0606389 | -0.14 | 0.886 | -.1275492 | .1101508 |
| _cons    |  | 109.7255  | 7.040773 | 15.58 | 0.000 | 95.92582  | 123.5251 |

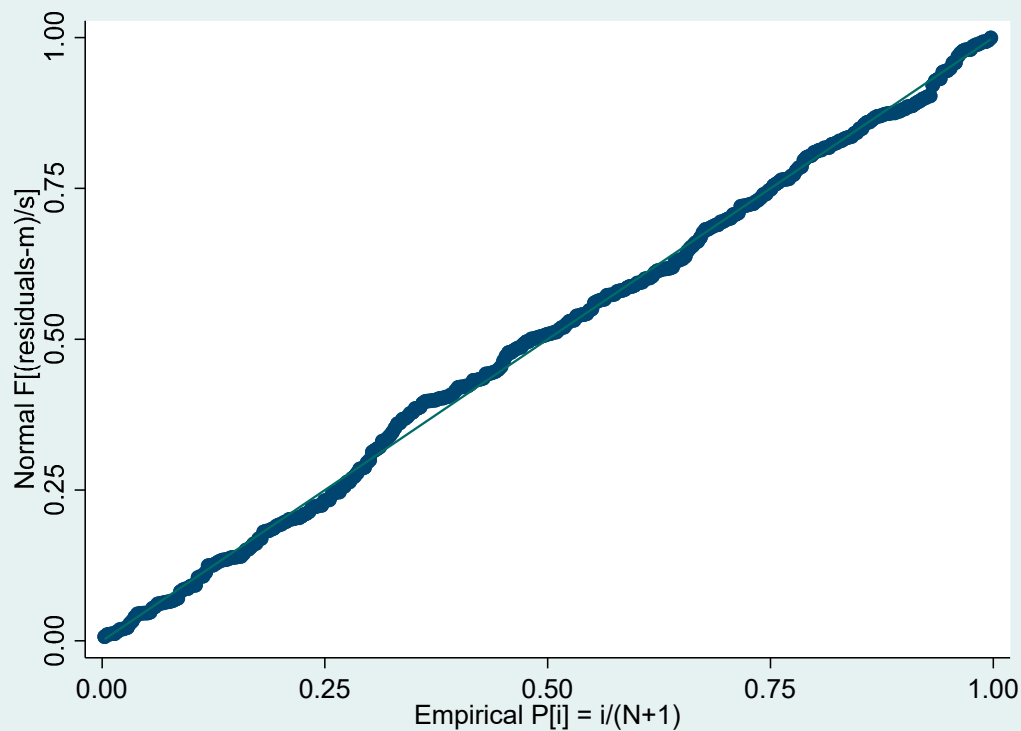

30'

|        |  | Delta-method |           | Bonferroni |       |
|--------|--|--------------|-----------|------------|-------|
|        |  | Contrast     | std. err. | z          | P> z  |
| dose   |  |              |           |            |       |
| 1 vs 0 |  | -4.250505    | 2.913429  | -1.46      | 0.867 |
| 2 vs 0 |  | -7.412264    | 2.8881    | -2.57      | 0.062 |
| 3 vs 0 |  | -21.60016    | 2.927956  | -7.38      | 0.000 |
| 2 vs 1 |  | -3.161759    | 2.908843  | -1.09      | 1.000 |
| 3 vs 1 |  | -17.34966    | 2.889526  | -6.00      | 0.000 |
| 3 vs 2 |  | -14.1879     | 2.922177  | -4.86      | 0.000 |

60'

| -----       |  |              |           |                |
|-------------|--|--------------|-----------|----------------|
|             |  | Delta-method |           | Bonferroni     |
|             |  | Contrast     | std. err. | z      P> z    |
| -----+----- |  |              |           |                |
| dose        |  |              |           |                |
| 1 vs 0      |  | -17.23796    | 3.47572   | -4.96    0.000 |
| 2 vs 0      |  | -26.31828    | 3.454516  | -7.62    0.000 |
| 3 vs 0      |  | -44.82744    | 3.487906  | -12.85   0.000 |
| 2 vs 1      |  | -9.080321    | 3.471877  | -2.62    0.053 |
| 3 vs 1      |  | -27.58948    | 3.455708  | -7.98    0.000 |
| 3 vs 2      |  | -18.50916    | 3.483056  | -5.31    0.000 |
| -----       |  |              |           |                |

90'

| -----       |  |              |           |                |
|-------------|--|--------------|-----------|----------------|
|             |  | Delta-method |           | Bonferroni     |
|             |  | Contrast     | std. err. | z      P> z    |
| -----+----- |  |              |           |                |
| dose        |  |              |           |                |
| 1 vs 0      |  | -36.85828    | 2.873223  | -12.83   0.000 |
| 2 vs 0      |  | -51.56728    | 2.847537  | -18.11   0.000 |
| 3 vs 0      |  | -65.38466    | 2.887953  | -22.64   0.000 |
| 2 vs 1      |  | -14.709      | 2.868574  | -5.13    0.000 |
| 3 vs 1      |  | -28.52638    | 2.848983  | -10.01   0.000 |
| 3 vs 2      |  | -13.81738    | 2.882094  | -4.79    0.000 |
| -----       |  |              |           |                |

120'

| -----       |  |              |           |                |
|-------------|--|--------------|-----------|----------------|
|             |  | Delta-method |           | Bonferroni     |
|             |  | Contrast     | std. err. | z      P> z    |
| -----+----- |  |              |           |                |
| dose        |  |              |           |                |
| 1 vs 0      |  | -44.16345    | 3.544258  | -12.46   0.000 |
| 2 vs 0      |  | -59.15807    | 3.523467  | -16.79   0.000 |
| 3 vs 0      |  | -68.09559    | 3.55621   | -19.15   0.000 |
| 2 vs 1      |  | -14.99462    | 3.54049   | -4.24    0.000 |

|        |  |           |          |       |       |
|--------|--|-----------|----------|-------|-------|
| 3 vs 1 |  | -23.93213 | 3.524636 | -6.79 | 0.000 |
| 3 vs 2 |  | -8.937512 | 3.551453 | -2.52 | 0.071 |

180'

|        |  | Delta-method |           | Bonferroni |       |
|--------|--|--------------|-----------|------------|-------|
|        |  | Contrast     | std. err. | z          | P> z  |
| dose   |  |              |           |            |       |
| 1 vs 0 |  | 2.514933     | 3.544258  | 0.71       | 1.000 |
| 2 vs 0 |  | 2.829675     | 3.523467  | 0.80       | 1.000 |
| 3 vs 0 |  | -10.79759    | 3.55621   | -3.04      | 0.014 |
| 2 vs 1 |  | .3147427     | 3.54049   | 0.09       | 1.000 |
| 3 vs 1 |  | -13.31253    | 3.524636  | -3.78      | 0.001 |
| 3 vs 2 |  | -13.62727    | 3.551453  | -3.84      | 0.001 |

Figure 10. nSWDs

|                  |  | Coefficient | Std. err. | z      | P> z  | [95% conf. interval] |           |
|------------------|--|-------------|-----------|--------|-------|----------------------|-----------|
| dose             |  |             |           |        |       |                      |           |
| 1                |  | -.7026878   | .560155   | -1.25  | 0.210 | -1.800571            | .3951958  |
| 2                |  | -.9249763   | .560155   | -1.65  | 0.099 | -2.02286             | .1729073  |
| 3                |  | -.0268976   | .5596527  | -0.05  | 0.962 | -1.123797            | 1.070001  |
|                  |  |             |           |        |       |                      |           |
| timeknot1        |  | -.0013696   | .0131804  | -0.10  | 0.917 | -.0272028            | .0244635  |
| timeknot2        |  | .0523724    | .1201401  | 0.44   | 0.663 | -.1830978            | .2878425  |
| timeknot3        |  | -.2266903   | .3684696  | -0.62  | 0.538 | -.9488775            | .495497   |
| timeknot4        |  | .3812019    | .5089395  | 0.75   | 0.454 | -.6163012            | 1.378705  |
| timeknot5        |  | -.2743449   | .5089394  | -0.54  | 0.590 | -1.271848            | .723158   |
|                  |  |             |           |        |       |                      |           |
| dose#c.timeknot1 |  |             |           |        |       |                      |           |
| 1                |  | -.0847212   | .01864    | -4.55  | 0.000 | -.1212549            | -.0481876 |
| 2                |  | -.1363515   | .01864    | -7.32  | 0.000 | -.1728851            | -.0998178 |
| 3                |  | -.2198872   | .01864    | -11.80 | 0.000 | -.2564209            | -.1833536 |
|                  |  |             |           |        |       |                      |           |
| dose#c.timeknot2 |  |             |           |        |       |                      |           |
| 1                |  | .5708421    | .1699037  | 3.36   | 0.001 | .237837              | .9038472  |
| 2                |  | .7777785    | .1699037  | 4.58   | 0.000 | .4447734             | 1.110784  |
| 3                |  | 1.35412     | .1699037  | 7.97   | 0.000 | 1.021114             | 1.687125  |
|                  |  |             |           |        |       |                      |           |
| dose#c.timeknot3 |  |             |           |        |       |                      |           |
| 1                |  | -1.070831   | .5210948  | -2.05  | 0.040 | -2.092158            | -.0495038 |
| 2                |  | -1.310072   | .5210948  | -2.51  | 0.012 | -2.331399            | -.2887452 |
| 3                |  | -2.851814   | .5210948  | -5.47  | 0.000 | -3.873141            | -1.830487 |
|                  |  |             |           |        |       |                      |           |
| dose#c.timeknot4 |  |             |           |        |       |                      |           |
| 1                |  | .0381417    | .7197492  | 0.05   | 0.958 | -1.372541            | 1.448824  |
| 2                |  | -.1022441   | .7197492  | -0.14  | 0.887 | -1.512927            | 1.308438  |
| 3                |  | 1.685723    | .7197492  | 2.34   | 0.019 | .2750402             | 3.096405  |
|                  |  |             |           |        |       |                      |           |

|                  |  |           |          |       |       |           |          |
|------------------|--|-----------|----------|-------|-------|-----------|----------|
| dose#c.timeknot5 |  |           |          |       |       |           |          |
| 1                |  | .9740429  | .719749  | 1.35  | 0.176 | -.4366393 | 2.384725 |
| 2                |  | .8217314  | .719749  | 1.14  | 0.254 | -.5889508 | 2.232414 |
| 3                |  | -.7735347 | .719749  | -1.07 | 0.282 | -2.184217 | .6371475 |
|                  |  |           |          |       |       |           |          |
| baseline         |  | .0273705  | .0848509 | 0.32  | 0.747 | -.1389342 | .1936751 |
| _cons            |  | 12.15622  | 1.112107 | 10.93 | 0.000 | 9.976527  | 14.33591 |

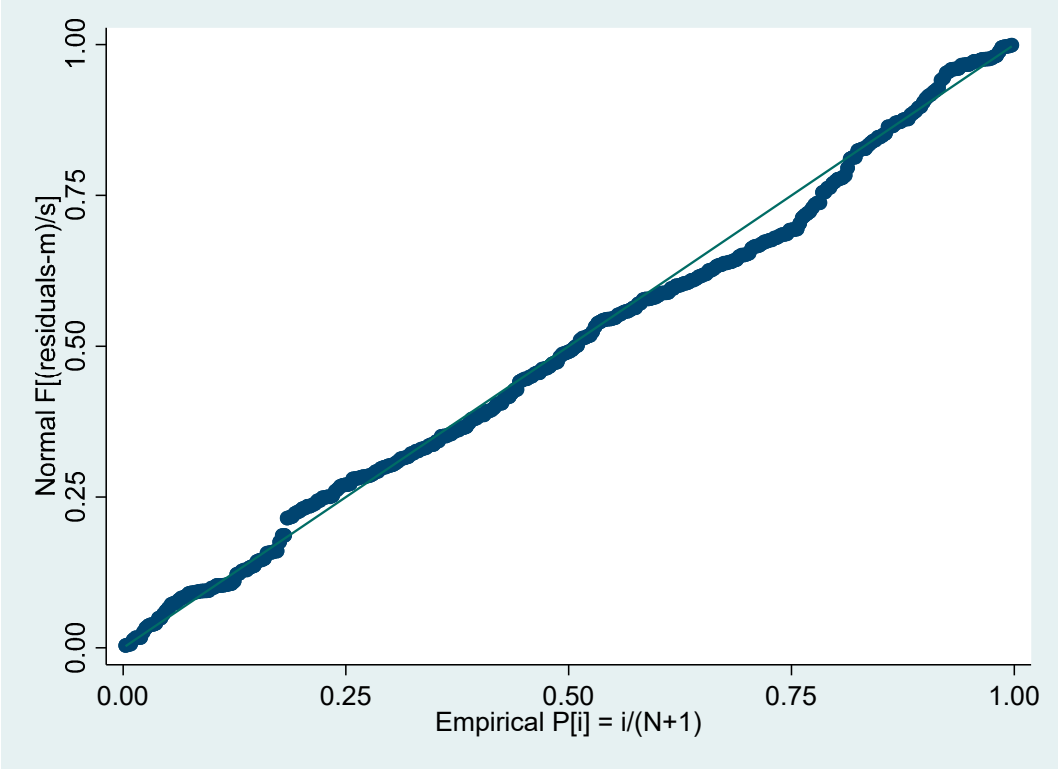

30'

|        |  | Delta-method |           | Bonferroni |       |
|--------|--|--------------|-----------|------------|-------|
|        |  | Contrast     | std. err. | z          | P> z  |
| dose   |  |              |           |            |       |
| 1 vs 0 |  | -3.073072    | .3802293  | -8.08      | 0.000 |
| 2 vs 0 |  | -4.782187    | .3802293  | -12.58     | 0.000 |
| 3 vs 0 |  | -6.217278    | .3794889  | -16.38     | 0.000 |
| 2 vs 1 |  | -1.709116    | .3788956  | -4.51      | 0.000 |
| 3 vs 1 |  | -3.144206    | .379044   | -8.30      | 0.000 |
| 3 vs 2 |  | -1.435091    | .379044   | -3.79      | 0.001 |



60'

| -----       |  |              |           |              |
|-------------|--|--------------|-----------|--------------|
|             |  | Delta-method |           | Bonferroni   |
|             |  | Contrast     | std. err. | z P> z       |
| -----+----- |  |              |           |              |
| dose        |  |              |           |              |
| 1 vs 0      |  | -4.41594     | .4490567  | -9.83 0.000  |
| 2 vs 0      |  | -7.239397    | .4490567  | -16.12 0.000 |
| 3 vs 0      |  | -9.970243    | .44843    | -22.23 0.000 |
| 2 vs 1      |  | -2.823457    | .447928   | -6.30 0.000  |
| 3 vs 1      |  | -5.554303    | .4480536  | -12.40 0.000 |
| 3 vs 2      |  | -2.730846    | .4480536  | -6.09 0.000  |
| -----       |  |              |           |              |

90'

| -----       |  |              |           |              |
|-------------|--|--------------|-----------|--------------|
|             |  | Delta-method |           | Bonferroni   |
|             |  | Contrast     | std. err. | z P> z       |
| -----+----- |  |              |           |              |
| dose        |  |              |           |              |
| 1 vs 0      |  | -4.025026    | .3753371  | -10.72 0.000 |
| 2 vs 0      |  | -7.289626    | .3753371  | -19.42 0.000 |
| 3 vs 0      |  | -9.703922    | .3745871  | -25.91 0.000 |
| 2 vs 1      |  | -3.2646      | .373986   | -8.73 0.000  |
| 3 vs 1      |  | -5.678896    | .3741364  | -15.18 0.000 |
| 3 vs 2      |  | -2.414296    | .3741364  | -6.45 0.000  |
| -----       |  |              |           |              |

120'

| -----       |  |              |           |              |
|-------------|--|--------------|-----------|--------------|
|             |  | Delta-method |           | Bonferroni   |
|             |  | Contrast     | std. err. | z P> z       |
| -----+----- |  |              |           |              |
| dose        |  |              |           |              |
| 1 vs 0      |  | -2.479059    | .457489   | -5.42 0.000  |
| 2 vs 0      |  | -5.49798     | .457489   | -12.02 0.000 |
| 3 vs 0      |  | -7.25862     | .4568738  | -15.89 0.000 |

|        |  |           |          |        |       |
|--------|--|-----------|----------|--------|-------|
| 2 vs 1 |  | -3.018921 | .4563811 | -6.61  | 0.000 |
| 3 vs 1 |  | -4.779561 | .4565043 | -10.47 | 0.000 |
| 3 vs 2 |  | -1.76064  | .4565043 | -3.86  | 0.001 |

180'

|        |  | Delta-method |           | Bonferroni |       |
|--------|--|--------------|-----------|------------|-------|
|        |  | Contrast     | std. err. | z          | P> z  |
| dose   |  |              |           |            |       |
| 1 vs 0 |  | .5696519     | .457489   | 1.25       | 1.000 |
| 2 vs 0 |  | -.4669662    | .457489   | -1.02      | 1.000 |
| 3 vs 0 |  | -2.568739    | .4568738  | -5.62      | 0.000 |
| 2 vs 1 |  | -1.036618    | .4563811  | -2.27      | 0.139 |
| 3 vs 1 |  | -3.138391    | .4565043  | -6.87      | 0.000 |
| 3 vs 2 |  | -2.101773    | .4565043  | -4.60      | 0.000 |

Figure 11. dSWDs

|                  |  | Coefficient | Std. err. | z     | P> z  | [95% conf. interval] |           |
|------------------|--|-------------|-----------|-------|-------|----------------------|-----------|
| dose             |  |             |           |       |       |                      |           |
| 1                |  | .4450147    | 3.598795  | 0.12  | 0.902 | -6.608494            | 7.498524  |
| 2                |  | 6.11919     | 3.583862  | 1.71  | 0.088 | -.9050509            | 13.14343  |
| 3                |  | 4.719592    | 3.582456  | 1.32  | 0.188 | -2.301894            | 11.74108  |
|                  |  |             |           |       |       |                      |           |
| timeknot1        |  | -.0044231   | .0857238  | -0.05 | 0.959 | -.1724388            | .1635925  |
| timeknot2        |  | .1911349    | .781375   | 0.24  | 0.807 | -1.340332            | 1.722602  |
| timeknot3        |  | -.5954936   | 2.396478  | -0.25 | 0.804 | -5.292504            | 4.101516  |
| timeknot4        |  | .8207698    | 3.310075  | 0.25  | 0.804 | -5.666858            | 7.308398  |
| timeknot5        |  | -.9864987   | 3.310075  | -0.30 | 0.766 | -7.474126            | 5.501128  |
|                  |  |             |           |       |       |                      |           |
| dose#c.timeknot1 |  |             |           |       |       |                      |           |
| 1                |  | -.1908524   | .1212318  | -1.57 | 0.115 | -.4284624            | .0467576  |
| 2                |  | .0147066    | .1212318  | 0.12  | 0.903 | -.2229034            | .2523166  |
| 3                |  | -.2865766   | .1212318  | -2.36 | 0.018 | -.5241866            | -.0489666 |
|                  |  |             |           |       |       |                      |           |
| dose#c.timeknot2 |  |             |           |       |       |                      |           |
| 1                |  | -.429172    | 1.105031  | -0.39 | 0.698 | -2.594993            | 1.736649  |
| 2                |  | -6.984897   | 1.105031  | -6.32 | 0.000 | -9.150719            | -4.819076 |
| 3                |  | -4.745276   | 1.105031  | -4.29 | 0.000 | -6.911098            | -2.579455 |
|                  |  |             |           |       |       |                      |           |
| dose#c.timeknot3 |  |             |           |       |       |                      |           |
| 1                |  | 2.681295    | 3.389131  | 0.79  | 0.429 | -3.96128             | 9.32387   |
| 2                |  | 25.72382    | 3.389131  | 7.59  | 0.000 | 19.08124             | 32.36639  |
| 3                |  | 19.76678    | 3.389131  | 5.83  | 0.000 | 13.1242              | 26.40936  |
|                  |  |             |           |       |       |                      |           |
| dose#c.timeknot4 |  |             |           |       |       |                      |           |
| 1                |  | -2.977631   | 4.681153  | -0.64 | 0.525 | -12.15252            | 6.19726   |
| 2                |  | -34.19537   | 4.681153  | -7.30 | 0.000 | -43.37026            | -25.02048 |
| 3                |  | -27.69782   | 4.681153  | -5.92 | 0.000 | -36.87271            | -18.52293 |
|                  |  |             |           |       |       |                      |           |
| dose#c.timeknot5 |  |             |           |       |       |                      |           |

|          |  |           |          |       |       |           |          |
|----------|--|-----------|----------|-------|-------|-----------|----------|
| 1        |  | -2.201721 | 4.681152 | -0.47 | 0.638 | -11.37661 | 6.973169 |
| 2        |  | 18.60893  | 4.681152 | 3.98  | 0.000 | 9.434038  | 27.78382 |
| 3        |  | 13.56916  | 4.681152 | 2.90  | 0.004 | 4.394269  | 22.74405 |
|          |  |           |          |       |       |           |          |
| baseline |  | .0376066  | .0538034 | 0.70  | 0.485 | -.0678462 | .1430594 |
| _cons    |  | 102.0754  | 6.183487 | 16.51 | 0.000 | 89.95597  | 114.1948 |

-----

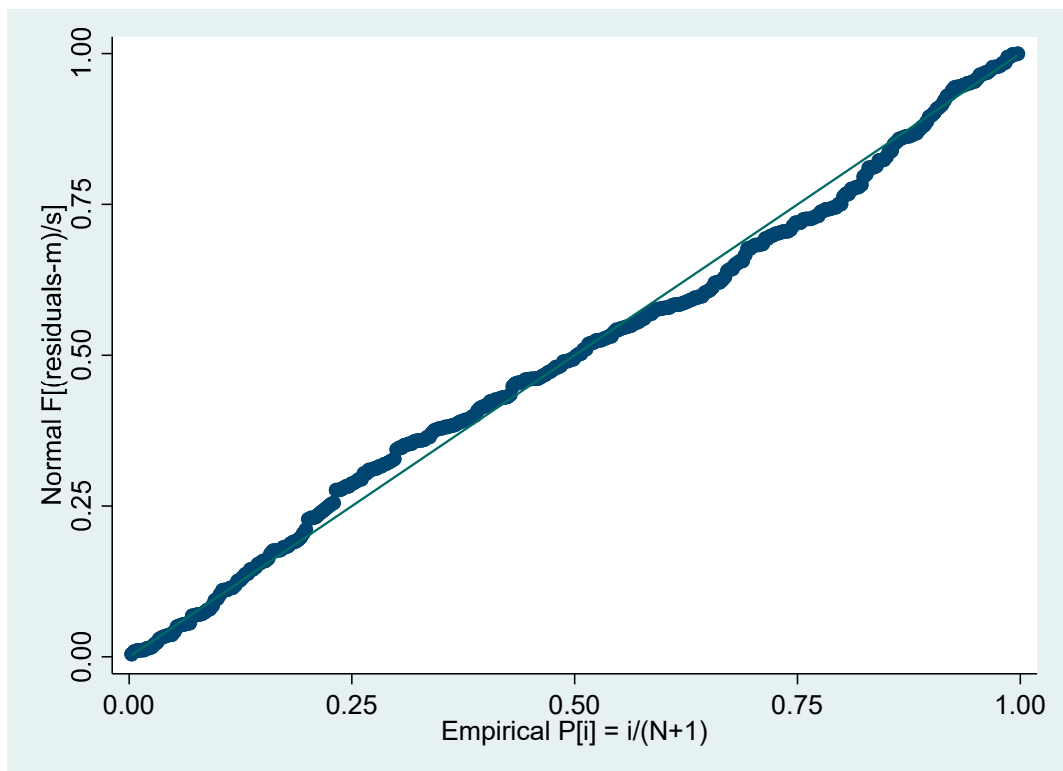

30'

-----

|   |      | Delta-method |           | Bonferroni |       |
|---|------|--------------|-----------|------------|-------|
|   |      | Contrast     | std. err. | z          | P> z  |
|   | dose |              |           |            |       |
| 1 | vs 0 | -5.409308    | 2.407104  | -2.25      | 0.148 |
| 2 | vs 0 | 4.46492      | 2.38472   | 1.87       | 0.367 |
| 3 | vs 0 | -5.30129     | 2.382607  | -2.22      | 0.156 |
| 2 | vs 1 | 9.874227     | 2.372108  | 4.16       | 0.000 |
| 3 | vs 1 | .1080181     | 2.373315  | 0.05       | 1.000 |
| 3 | vs 2 | -9.766209    | 2.367517  | -4.13      | 0.000 |

-----

60'

| -----       |  |              |           |             |
|-------------|--|--------------|-----------|-------------|
|             |  | Delta-method |           | Bonferroni  |
|             |  | Contrast     | std. err. | z P> z      |
| -----+----- |  |              |           |             |
| dose        |  |              |           |             |
| 1 vs 0      |  | -12.03614    | 2.865056  | -4.20 0.000 |
| 2 vs 0      |  | -9.762167    | 2.846276  | -3.43 0.004 |
| 3 vs 0      |  | -23.86367    | 2.844506  | -8.39 0.000 |
| 2 vs 1      |  | 2.273973     | 2.835718  | 0.80 1.000  |
| 3 vs 1      |  | -11.82753    | 2.836728  | -4.17 0.000 |
| 3 vs 2      |  | -14.1015     | 2.831878  | -4.98 0.000 |
| -----       |  |              |           |             |

90'

| -----       |  |              |           |              |
|-------------|--|--------------|-----------|--------------|
|             |  | Delta-method |           | Bonferroni   |
|             |  | Contrast     | std. err. | z P> z       |
| -----+----- |  |              |           |              |
| dose        |  |              |           |              |
| 1 vs 0      |  | -19.4036     | 2.374403  | -8.17 0.000  |
| 2 vs 0      |  | -41.41774    | 2.351708  | -17.61 0.000 |
| 3 vs 0      |  | -53.57901    | 2.349565  | -22.80 0.000 |
| 2 vs 1      |  | -22.01414    | 2.338919  | -9.41 0.000  |
| 3 vs 1      |  | -34.17541    | 2.340143  | -14.60 0.000 |
| 3 vs 2      |  | -12.16127    | 2.334262  | -5.21 0.000  |
| -----       |  |              |           |              |

120'

| -----       |  |              |           |              |
|-------------|--|--------------|-----------|--------------|
|             |  | Delta-method |           | Bonferroni   |
|             |  | Contrast     | std. err. | z P> z       |
| -----+----- |  |              |           |              |
| dose        |  |              |           |              |
| 1 vs 0      |  | -24.26226    | 2.920942  | -8.31 0.000  |
| 2 vs 0      |  | -64.48888    | 2.902523  | -22.22 0.000 |
| 3 vs 0      |  | -73.33864    | 2.900787  | -25.28 0.000 |

|        |  |           |          |        |       |
|--------|--|-----------|----------|--------|-------|
| 2 vs 1 |  | -40.22662 | 2.89217  | -13.91 | 0.000 |
| 3 vs 1 |  | -49.07638 | 2.89316  | -16.96 | 0.000 |
| 3 vs 2 |  | -8.849756 | 2.888406 | -3.06  | 0.013 |

180'

|        |  | Delta-method |           | Bonferroni |       |
|--------|--|--------------|-----------|------------|-------|
|        |  | Contrast     | std. err. | z          | P> z  |
| dose   |  |              |           |            |       |
| 1 vs 0 |  | -17.3842     | 2.920942  | -5.95      | 0.000 |
| 2 vs 0 |  | -32.02653    | 2.902523  | -11.03     | 0.000 |
| 3 vs 0 |  | -41.31071    | 2.900787  | -14.24     | 0.000 |
| 2 vs 1 |  | -14.64233    | 2.89217   | -5.06      | 0.000 |
| 3 vs 1 |  | -23.9265     | 2.89316   | -8.27      | 0.000 |
| 3 vs 2 |  | -9.284173    | 2.888406  | -3.21      | 0.008 |

Figure 11. nSWDs

|                  |  | Coefficient | Std. err. | z     | P> z  | [95% conf. interval] |           |
|------------------|--|-------------|-----------|-------|-------|----------------------|-----------|
| dose             |  |             |           |       |       |                      |           |
| 1                |  | .7162469    | .4809591  | 1.49  | 0.136 | -.2264156            | 1.658909  |
| 2                |  | .5157986    | .4809591  | 1.07  | 0.284 | -.4268639            | 1.458461  |
| 3                |  | 2.01294     | .481072   | 4.18  | 0.000 | 1.070056             | 2.955824  |
|                  |  |             |           |       |       |                      |           |
| timeknot1        |  | -.0007253   | .0115403  | -0.06 | 0.950 | -.0233438            | .0218933  |
| timeknot2        |  | .0324524    | .10519    | 0.31  | 0.758 | -.1737162            | .2386211  |
| timeknot3        |  | -.1575469   | .3226179  | -0.49 | 0.625 | -.7898663            | .4747725  |
| timeknot4        |  | .3204619    | .4456079  | 0.72  | 0.472 | -.5529136            | 1.193837  |
| timeknot5        |  | -.320634    | .4456078  | -0.72 | 0.472 | -1.194009            | .5527413  |
|                  |  |             |           |       |       |                      |           |
| dose#c.timeknot1 |  |             |           |       |       |                      |           |
| 1                |  | -.0142406   | .0163204  | -0.87 | 0.383 | -.0462281            | .0177468  |
| 2                |  | -.0145866   | .0163204  | -0.89 | 0.371 | -.046574             | .0174009  |
| 3                |  | -.1073187   | .0163204  | -6.58 | 0.000 | -.1393062            | -.0753312 |
|                  |  |             |           |       |       |                      |           |
| dose#c.timeknot2 |  |             |           |       |       |                      |           |
| 1                |  | -.2654358   | .1487612  | -1.78 | 0.074 | -.5570023            | .0261307  |
| 2                |  | -.6949542   | .1487612  | -4.67 | 0.000 | -.9865207            | -.4033877 |
| 3                |  | -.1086007   | .1487612  | -0.73 | 0.465 | -.4001672            | .1829658  |
|                  |  |             |           |       |       |                      |           |
| dose#c.timeknot3 |  |             |           |       |       |                      |           |
| 1                |  | 1.202032    | .4562506  | 2.63  | 0.008 | .3077977             | 2.096267  |
| 2                |  | 2.754203    | .4562506  | 6.04  | 0.000 | 1.859968             | 3.648438  |
| 3                |  | 1.292621    | .4562506  | 2.83  | 0.005 | .3983867             | 2.186856  |
|                  |  |             |           |       |       |                      |           |
| dose#c.timeknot4 |  |             |           |       |       |                      |           |
| 1                |  | -2.060036   | .6301848  | -3.27 | 0.001 | -3.295176            | -.8248967 |
| 2                |  | -3.913172   | .6301848  | -6.21 | 0.000 | -5.148312            | -2.678033 |
| 3                |  | -2.487923   | .6301848  | -3.95 | 0.000 | -3.723063            | -1.252784 |
|                  |  |             |           |       |       |                      |           |
| dose#c.timeknot5 |  |             |           |       |       |                      |           |

|          |  |          |          |       |       |          |          |
|----------|--|----------|----------|-------|-------|----------|----------|
| 1        |  | 1.773221 | .6301846 | 2.81  | 0.005 | .5380822 | 3.008361 |
| 2        |  | 2.223594 | .6301846 | 3.53  | 0.000 | .9884552 | 3.458734 |
| 3        |  | 1.284818 | .6301846 | 2.04  | 0.041 | .0496789 | 2.519957 |
|          |  |          |          |       |       |          |          |
| baseline |  | .1162856 | .048132  | 2.42  | 0.016 | .0219486 | .2106225 |
| _cons    |  | 11.03353 | .6858731 | 16.09 | 0.000 | 9.689244 | 12.37782 |

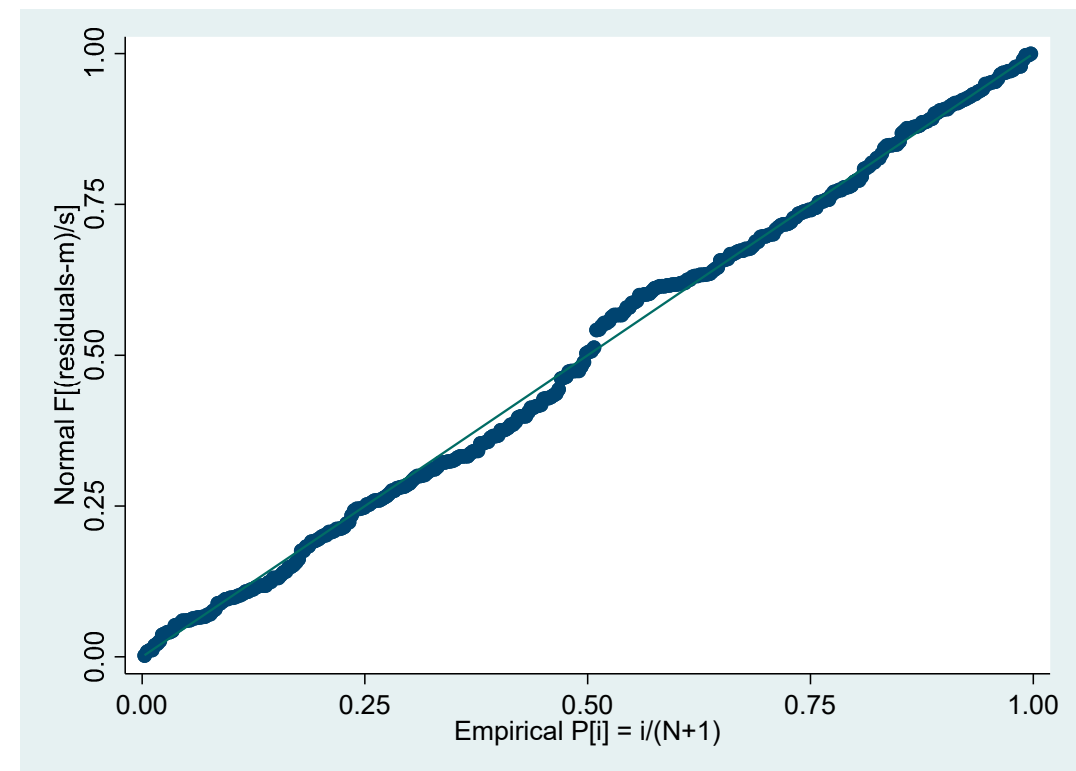

30'

|        |  | Delta-method |           | Bonferroni |       |
|--------|--|--------------|-----------|------------|-------|
|        |  | Contrast     | std. err. | z          | P> z  |
| dose   |  |              |           |            |       |
| 1 vs 0 |  | .2093975     | .3187665  | 0.66       | 1.000 |
| 2 vs 0 |  | -.1302847    | .3187665  | -0.41      | 1.000 |
| 3 vs 0 |  | -1.239202    | .3189368  | -3.89      | 0.001 |
| 2 vs 1 |  | -.3396822    | .3187097  | -1.07      | 1.000 |
| 3 vs 1 |  | -1.448599    | .3192204  | -4.54      | 0.000 |
| 3 vs 2 |  | -1.108917    | .3192204  | -3.47      | 0.003 |



60'

| -----       |  |              |           |              |
|-------------|--|--------------|-----------|--------------|
|             |  | Delta-method |           | Bonferroni   |
|             |  | Contrast     | std. err. | z P> z       |
| -----+----- |  |              |           |              |
| dose        |  |              |           |              |
| 1 vs 0      |  | -.7752363    | .3812719  | -2.03 0.252  |
| 2 vs 0      |  | -2.027286    | .3812719  | -5.32 0.000  |
| 3 vs 0      |  | -4.686824    | .3814143  | -12.29 0.000 |
| 2 vs 1      |  | -1.252049    | .3812244  | -3.28 0.006  |
| 3 vs 1      |  | -3.911588    | .3816515  | -10.25 0.000 |
| 3 vs 2      |  | -2.659539    | .3816515  | -6.97 0.000  |
| -----       |  |              |           |              |

90'

| -----       |  |              |           |              |
|-------------|--|--------------|-----------|--------------|
|             |  | Delta-method |           | Bonferroni   |
|             |  | Contrast     | std. err. | z P> z       |
| -----+----- |  |              |           |              |
| dose        |  |              |           |              |
| 1 vs 0      |  | -2.354829    | .3142904  | -7.49 0.000  |
| 2 vs 0      |  | -5.599861    | .3142904  | -17.82 0.000 |
| 3 vs 0      |  | -8.137623    | .3144631  | -25.88 0.000 |
| 2 vs 1      |  | -3.245032    | .3142328  | -10.33 0.000 |
| 3 vs 1      |  | -5.782794    | .3147507  | -18.37 0.000 |
| 3 vs 2      |  | -2.537762    | .3147507  | -8.06 0.000  |
| -----       |  |              |           |              |

120'

| -----       |  |              |           |              |
|-------------|--|--------------|-----------|--------------|
|             |  | Delta-method |           | Bonferroni   |
|             |  | Contrast     | std. err. | z P> z       |
| -----+----- |  |              |           |              |
| dose        |  |              |           |              |
| 1 vs 0      |  | -3.204117    | .3888809  | -8.24 0.000  |
| 2 vs 0      |  | -7.967623    | .3888809  | -20.49 0.000 |
| 3 vs 0      |  | -9.848148    | .3890205  | -25.32 0.000 |
| 2 vs 1      |  | -4.763506    | .3888344  | -12.25 0.000 |

|        |  |           |          |        |       |
|--------|--|-----------|----------|--------|-------|
| 3 vs 1 |  | -6.64403  | .3892531 | -17.07 | 0.000 |
| 3 vs 2 |  | -1.880525 | .3892531 | -4.83  | 0.000 |

180'

|        |  | Delta-method |           | Bonferroni |       |
|--------|--|--------------|-----------|------------|-------|
|        |  | Contrast     | std. err. | z          | P> z  |
| dose   |  |              |           |            |       |
| 1 vs 0 |  | -.9123686    | .3888809  | -2.35      | 0.114 |
| 2 vs 0 |  | -3.65373     | .3888809  | -9.40      | 0.000 |
| 3 vs 0 |  | -5.494439    | .3890205  | -14.12     | 0.000 |
| 2 vs 1 |  | -2.741361    | .3888344  | -7.05      | 0.000 |
| 3 vs 1 |  | -4.58207     | .3892531  | -11.77     | 0.000 |
| 3 vs 2 |  | -1.840709    | .3892531  | -4.73      | 0.000 |

Figure 12. dSWDs

|                  |  | Coefficient | Std. err. | z      | P> z  | [95% conf. interval] |           |
|------------------|--|-------------|-----------|--------|-------|----------------------|-----------|
| dose             |  |             |           |        |       |                      |           |
| 1                |  | -2.727592   | 3.077085  | -0.89  | 0.375 | -8.758568            | 3.303385  |
| 2                |  | .8654846    | 3.069759  | 0.28   | 0.778 | -5.151132            | 6.882101  |
| 3                |  | -4.671747   | 3.07002   | -1.52  | 0.128 | -10.68888            | 1.345382  |
|                  |  |             |           |        |       |                      |           |
| timeknot1        |  | .1130404    | .0736203  | 1.54   | 0.125 | -.0312528            | .2573336  |
| timeknot2        |  | -.8035406   | .6710511  | -1.20  | 0.231 | -2.118777            | .5116953  |
| timeknot3        |  | 2.211551    | 2.058114  | 1.07   | 0.283 | -1.822279            | 6.245381  |
| timeknot4        |  | -2.677709   | 2.842719  | -0.94  | 0.346 | -8.249336            | 2.893918  |
| timeknot5        |  | 2.491031    | 2.842719  | 0.88   | 0.381 | -3.080595            | 8.062657  |
|                  |  |             |           |        |       |                      |           |
| dose#c.timeknot1 |  |             |           |        |       |                      |           |
| 1                |  | -.3591498   | .1041149  | -3.45  | 0.001 | -.5632112            | -.1550884 |
| 2                |  | -1.309529   | .1041149  | -12.58 | 0.000 | -1.51359             | -1.105468 |
| 3                |  | -1.589347   | .1041149  | -15.27 | 0.000 | -1.793409            | -1.385286 |
|                  |  |             |           |        |       |                      |           |
| dose#c.timeknot2 |  |             |           |        |       |                      |           |
| 1                |  | 1.803101    | .9490096  | 1.90   | 0.057 | -.0569233            | 3.663126  |
| 2                |  | 8.323743    | .9490096  | 8.77   | 0.000 | 6.463719             | 10.18377  |
| 3                |  | 9.827937    | .9490096  | 10.36  | 0.000 | 7.967912             | 11.68796  |
|                  |  |             |           |        |       |                      |           |
| dose#c.timeknot3 |  |             |           |        |       |                      |           |
| 1                |  | -3.385407   | 2.910613  | -1.16  | 0.245 | -9.090104            | 2.31929   |
| 2                |  | -19.72065   | 2.910613  | -6.78  | 0.000 | -25.42535            | -14.01595 |
| 3                |  | -22.89664   | 2.910613  | -7.87  | 0.000 | -28.60134            | -17.19194 |
|                  |  |             |           |        |       |                      |           |
| dose#c.timeknot4 |  |             |           |        |       |                      |           |
| 1                |  | 1.528338    | 4.020212  | 0.38   | 0.704 | -6.351133            | 9.407808  |
| 2                |  | 18.17096    | 4.020212  | 4.52   | 0.000 | 10.29149             | 26.05043  |
| 3                |  | 20.4611     | 4.020212  | 5.09   | 0.000 | 12.58163             | 28.34057  |
|                  |  |             |           |        |       |                      |           |
| dose#c.timeknot5 |  |             |           |        |       |                      |           |

|          |  |           |          |       |       |           |           |
|----------|--|-----------|----------|-------|-------|-----------|-----------|
| 1        |  | -.5593166 | 4.020211 | -0.14 | 0.889 | -8.438786 | 7.320153  |
| 2        |  | -15.18881 | 4.020211 | -3.78 | 0.000 | -23.06828 | -7.309345 |
| 3        |  | -15.94224 | 4.020211 | -3.97 | 0.000 | -23.8217  | -8.062766 |
|          |  |           |          |       |       |           |           |
| baseline |  | .0434559  | .0414717 | 1.05  | 0.295 | -.0378272 | .124739   |
| _cons    |  | 84.3573   | 4.280075 | 19.71 | 0.000 | 75.96851  | 92.74609  |

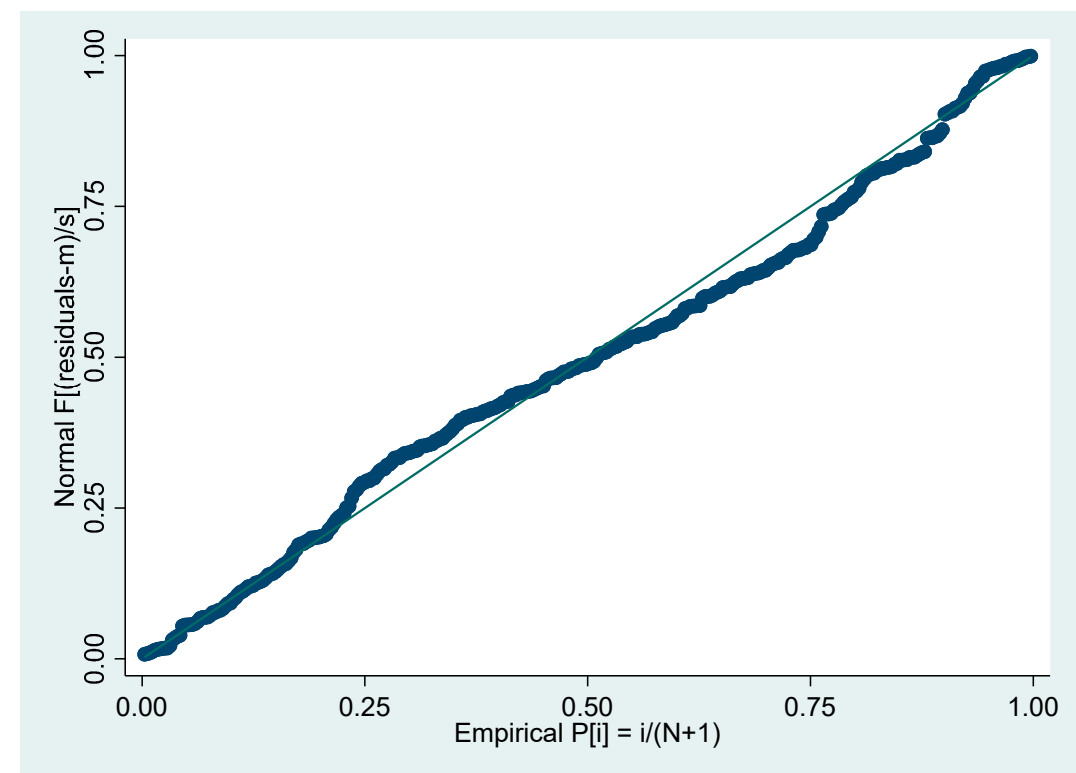

30'

|        |  | Delta-method |           | Bonferroni |       |
|--------|--|--------------|-----------|------------|-------|
|        |  | Contrast     | std. err. | z          | P> z  |
| dose   |  |              |           |            |       |
| 1 vs 0 |  | -12.96116    | 2.046868  | -6.33      | 0.000 |
| 2 vs 0 |  | -35.92326    | 2.035837  | -17.65     | 0.000 |
| 3 vs 0 |  | -49.40378    | 2.036231  | -24.26     | 0.000 |
| 2 vs 1 |  | -22.96211    | 2.051264  | -11.19     | 0.000 |
| 3 vs 1 |  | -36.44263    | 2.053453  | -17.75     | 0.000 |
| 3 vs 2 |  | -13.48052    | 2.035548  | -6.62      | 0.000 |

60'

| -----       |  |              |           |              |
|-------------|--|--------------|-----------|--------------|
|             |  | Delta-method |           | Bonferroni   |
|             |  | Contrast     | std. err. | z P> z       |
| -----+----- |  |              |           |              |
| dose        |  |              |           |              |
| 1 vs 0      |  | -19.94914    | 2.443443  | -8.16 0.000  |
| 2 vs 0      |  | -57.72927    | 2.43421   | -23.72 0.000 |
| 3 vs 0      |  | -76.44553    | 2.434539  | -31.40 0.000 |
| 2 vs 1      |  | -37.78014    | 2.447127  | -15.44 0.000 |
| 3 vs 1      |  | -56.4964     | 2.448961  | -23.07 0.000 |
| 3 vs 2      |  | -18.71626    | 2.433968  | -7.69 0.000  |
| -----       |  |              |           |              |

90'

| -----       |  |              |           |              |
|-------------|--|--------------|-----------|--------------|
|             |  | Delta-method |           | Bonferroni   |
|             |  | Contrast     | std. err. | z P> z       |
| -----+----- |  |              |           |              |
| dose        |  |              |           |              |
| 1 vs 0      |  | -21.46158    | 2.018501  | -10.63 0.000 |
| 2 vs 0      |  | -55.486      | 2.007315  | -27.64 0.000 |
| 3 vs 0      |  | -74.9757     | 2.007714  | -37.34 0.000 |
| 2 vs 1      |  | -34.02443    | 2.022959  | -16.82 0.000 |
| 3 vs 1      |  | -53.51412    | 2.025178  | -26.42 0.000 |
| 3 vs 2      |  | -19.4897     | 2.007021  | -9.71 0.000  |
| -----       |  |              |           |              |

120'

| -----       |  |              |           |              |
|-------------|--|--------------|-----------|--------------|
|             |  | Delta-method |           | Bonferroni   |
|             |  | Contrast     | std. err. | z P> z       |
| -----+----- |  |              |           |              |
| dose        |  |              |           |              |
| 1 vs 0      |  | -19.331      | 2.491767  | -7.76 0.000  |
| 2 vs 0      |  | -43.79168    | 2.482713  | -17.64 0.000 |
| 3 vs 0      |  | -61.64896    | 2.483037  | -24.83 0.000 |

|        |  |           |          |        |       |
|--------|--|-----------|----------|--------|-------|
| 2 vs 1 |  | -24.46068 | 2.495379 | -9.80  | 0.000 |
| 3 vs 1 |  | -42.31796 | 2.497179 | -16.95 | 0.000 |
| 3 vs 2 |  | -17.85728 | 2.482476 | -7.19  | 0.000 |

180'

|        |  | Delta-method |           | Bonferroni |       |
|--------|--|--------------|-----------|------------|-------|
|        |  | Contrast     | std. err. | z          | P> z  |
| dose   |  |              |           |            |       |
| 1 vs 0 |  | -11.8654     | 2.491766  | -4.76      | 0.000 |
| 2 vs 0 |  | -30.49729    | 2.482713  | -12.28     | 0.000 |
| 3 vs 0 |  | -44.41277    | 2.483037  | -17.89     | 0.000 |
| 2 vs 1 |  | -18.63189    | 2.495379  | -7.47      | 0.000 |
| 3 vs 1 |  | -32.54736    | 2.497179  | -13.03     | 0.000 |
| 3 vs 2 |  | -13.91547    | 2.482476  | -5.61      | 0.000 |

Figure 12. nSWDs

|                  |  | Coefficient | Std. err. | z     | P> z  | [95% conf. interval] |           |
|------------------|--|-------------|-----------|-------|-------|----------------------|-----------|
| dose             |  |             |           |       |       |                      |           |
| 1                |  | 1.364356    | .5384196  | 2.53  | 0.011 | .3090733             | 2.419639  |
| 2                |  | -.0513884   | .5384196  | -0.10 | 0.924 | -1.106671            | 1.003895  |
| 3                |  | -.0889673   | .5380627  | -0.17 | 0.869 | -1.143551            | .9656162  |
|                  |  |             |           |       |       |                      |           |
| timeknot1        |  | -.0151676   | .0129115  | -1.17 | 0.240 | -.0404736            | .0101384  |
| timeknot2        |  | .1964605    | .1176883  | 1.67  | 0.095 | -.0342043            | .4271254  |
| timeknot3        |  | -.5400723   | .3609501  | -1.50 | 0.135 | -1.247521            | .1673769  |
| timeknot4        |  | .4217386    | .4985533  | 0.85  | 0.398 | -.555408             | 1.398885  |
| timeknot5        |  | .1647279    | .4985532  | 0.33  | 0.741 | -.8124185            | 1.141874  |
|                  |  |             |           |       |       |                      |           |
| dose#c.timeknot1 |  |             |           |       |       |                      |           |
| 1                |  | -.034052    | .0182596  | -1.86 | 0.062 | -.0698401            | .0017361  |
| 2                |  | -.1365531   | .0182596  | -7.48 | 0.000 | -.1723412            | -.100765  |
| 3                |  | -.1789692   | .0182596  | -9.80 | 0.000 | -.2147573            | -.1431811 |
|                  |  |             |           |       |       |                      |           |
| dose#c.timeknot2 |  |             |           |       |       |                      |           |
| 1                |  | -.0154359   | .1664364  | -0.09 | 0.926 | -.3416452            | .3107734  |
| 2                |  | .7785483    | .1664364  | 4.68  | 0.000 | .452339              | 1.104758  |
| 3                |  | .965655     | .1664364  | 5.80  | 0.000 | .6394456             | 1.291864  |
|                  |  |             |           |       |       |                      |           |
| dose#c.timeknot3 |  |             |           |       |       |                      |           |
| 1                |  | .3050005    | .5104605  | 0.60  | 0.550 | -.6954837            | 1.305485  |
| 2                |  | -1.624951   | .5104605  | -3.18 | 0.001 | -2.625436            | -.6244672 |
| 3                |  | -1.900303   | .5104605  | -3.72 | 0.000 | -2.900787            | -.8998188 |
|                  |  |             |           |       |       |                      |           |
| dose#c.timeknot4 |  |             |           |       |       |                      |           |
| 1                |  | -.6020817   | .7050609  | -0.85 | 0.393 | -1.983976            | .7798123  |
| 2                |  | 1.085761    | .7050609  | 1.54  | 0.124 | -.2961326            | 2.467655  |
| 3                |  | .9349571    | .7050609  | 1.33  | 0.185 | -.4469368            | 2.316851  |
|                  |  |             |           |       |       |                      |           |
| dose#c.timeknot5 |  |             |           |       |       |                      |           |

|          |  |           |          |       |       |           |          |
|----------|--|-----------|----------|-------|-------|-----------|----------|
| 1        |  | .3006736  | .7050608 | 0.43  | 0.670 | -1.08122  | 1.682567 |
| 2        |  | -.8768236 | .7050608 | -1.24 | 0.214 | -2.258717 | .5050701 |
| 3        |  | -.3282438 | .7050608 | -0.47 | 0.642 | -1.710138 | 1.05365  |
|          |  |           |          |       |       |           |          |
| baseline |  | -.0168156 | .0522713 | -0.32 | 0.748 | -.1192654 | .0856343 |
| _cons    |  | 12.22068  | .7280461 | 16.79 | 0.000 | 10.79373  | 13.64762 |

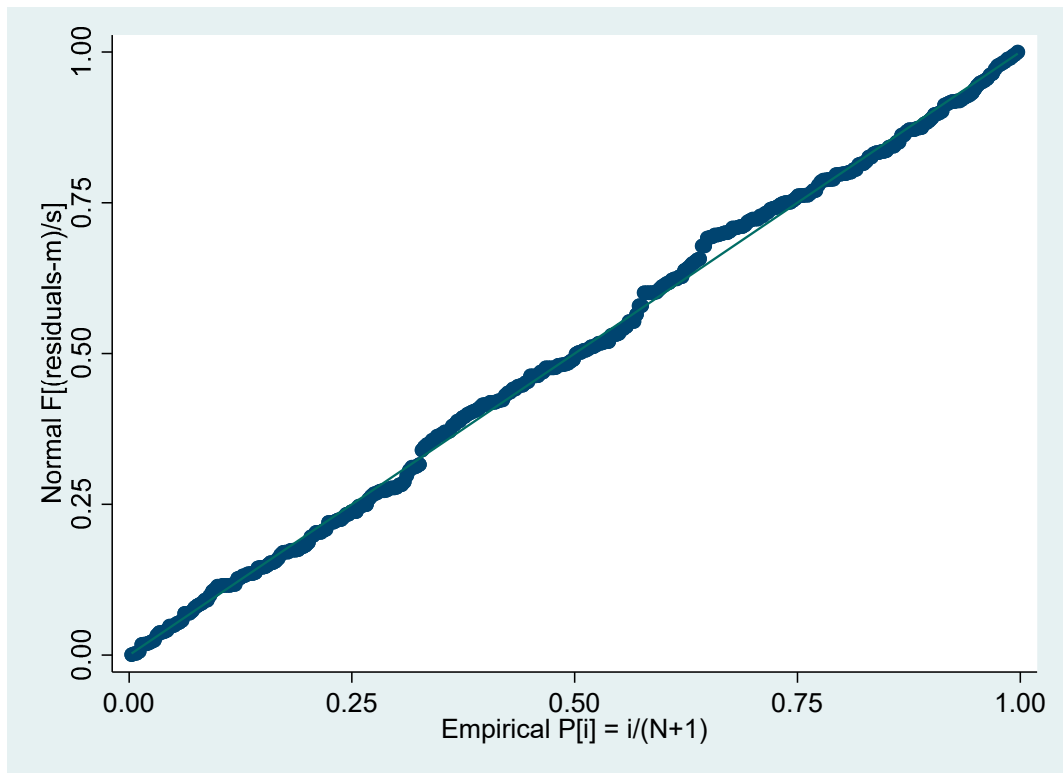

30'

|        |  | Delta-method |           | Bonferroni |       |
|--------|--|--------------|-----------|------------|-------|
|        |  | Contrast     | std. err. | z          | P> z  |
| dose   |  |              |           |            |       |
| 1 vs 0 |  | .3381658     | .3571159  | 0.95       | 1.000 |
| 2 vs 0 |  | -3.914416    | .3571159  | -10.96     | 0.000 |
| 3 vs 0 |  | -5.168348    | .3565776  | -14.49     | 0.000 |
| 2 vs 1 |  | -4.252582    | .3587262  | -11.85     | 0.000 |
| 3 vs 1 |  | -5.506514    | .3571159  | -15.42     | 0.000 |
| 3 vs 2 |  | -1.253931    | .3571159  | -3.51      | 0.003 |



60'

| -----       |  |              |           |              |
|-------------|--|--------------|-----------|--------------|
|             |  | Delta-method |           | Bonferroni   |
|             |  | Contrast     | std. err. | z P> z       |
| -----+----- |  |              |           |              |
| dose        |  |              |           |              |
| 1 vs 0      |  | -.7158093    | .4269702  | -1.68 0.562  |
| 2 vs 0      |  | -6.376057    | .4269702  | -14.93 0.000 |
| 3 vs 0      |  | -8.509549    | .42652    | -19.95 0.000 |
| 2 vs 1      |  | -5.660248    | .4283179  | -13.22 0.000 |
| 3 vs 1      |  | -7.79374     | .4269702  | -18.25 0.000 |
| 3 vs 2      |  | -2.133492    | .4269702  | -5.00 0.000  |
| -----       |  |              |           |              |

90'

| -----       |  |              |           |              |
|-------------|--|--------------|-----------|--------------|
|             |  | Delta-method |           | Bonferroni   |
|             |  | Contrast     | std. err. | z P> z       |
| -----+----- |  |              |           |              |
| dose        |  |              |           |              |
| 1 vs 0      |  | -1.733854    | .3521147  | -4.92 0.000  |
| 2 vs 0      |  | -6.52241     | .3521147  | -18.52 0.000 |
| 3 vs 0      |  | -8.944483    | .3515687  | -25.44 0.000 |
| 2 vs 1      |  | -4.788556    | .3537477  | -13.54 0.000 |
| 3 vs 1      |  | -7.21063     | .3521147  | -20.48 0.000 |
| 3 vs 2      |  | -2.422074    | .3521147  | -6.88 0.000  |
| -----       |  |              |           |              |

120'

| -----       |  |              |           |              |
|-------------|--|--------------|-----------|--------------|
|             |  | Delta-method |           | Bonferroni   |
|             |  | Contrast     | std. err. | z P> z       |
| -----+----- |  |              |           |              |
| dose        |  |              |           |              |
| 1 vs 0      |  | -2.286251    | .4354756  | -5.25 0.000  |
| 2 vs 0      |  | -5.389514    | .4354756  | -12.38 0.000 |
| 3 vs 0      |  | -7.585426    | .4350342  | -17.44 0.000 |
| 2 vs 1      |  | -3.103263    | .4367971  | -7.10 0.000  |

|        |  |           |          |        |       |
|--------|--|-----------|----------|--------|-------|
| 3 vs 1 |  | -5.299175 | .4354756 | -12.17 | 0.000 |
| 3 vs 2 |  | -2.195912 | .4354756 | -5.04  | 0.000 |

180'

|        |  | Delta-method | Bonferroni |       |       |
|--------|--|--------------|------------|-------|-------|
|        |  | Contrast     | std. err.  | z     | P> z  |
| dose   |  |              |            |       |       |
| 1 vs 0 |  | -1.354236    | .4354755   | -3.11 | 0.011 |
| 2 vs 0 |  | -2.774253    | .4354755   | -6.37 | 0.000 |
| 3 vs 0 |  | -3.970907    | .4350342   | -9.13 | 0.000 |
| 2 vs 1 |  | -1.420017    | .436797    | -3.25 | 0.007 |
| 3 vs 1 |  | -2.61667     | .4354755   | -6.01 | 0.000 |
| 3 vs 2 |  | -1.196653    | .4354755   | -2.75 | 0.036 |
